# Supplementary material
Source: PubMed Central journal article supplement (PMC3579547)

## **Supplemental Data**

Analysis of Naphthalene Adduct Binding Sites in Model Proteins by Tandem Mass Spectrometry

Nathalie T. Pham<sup>†\*</sup>, William T. Jewell<sup>‡</sup>, Dexter Morin<sup>†</sup>, Alan R. Buckpitt<sup>†</sup>

\*\*

Each of the following figures presents the MS/MS spectra of the adducted peptide products from actin and PDI.

For each figure, the  $m/z$  of the adducted peptide is given along with the corresponding MS/MS fragmentation.

Adducted fragment ions (modified by a metabolite) are ***italicized bold***. Nonadducted fragment ions are not.

$[M+H]^+$  = the nonadducted parent peptide ion;  $[M+H]^+$  = the monoadducted parent peptide ion.

$H_2O$  = water to the mass of the ion.

# = modification by naphthalene epoxide (NPO).

$\Psi$  = modification by naphthalene diol epoxide (NDO).

$\dagger$  = modification of 1,2-naphthoquinone (1,2NPQ).

$\circ$  = modification by 1,4-naphthoquinone (1,4NPQ).

Figure S1: MS/MS of adducted actin peptide [MEEIEAALVIDNGSGMCK + NPO] at  $m/z$  1026.9643 (doubly charged).

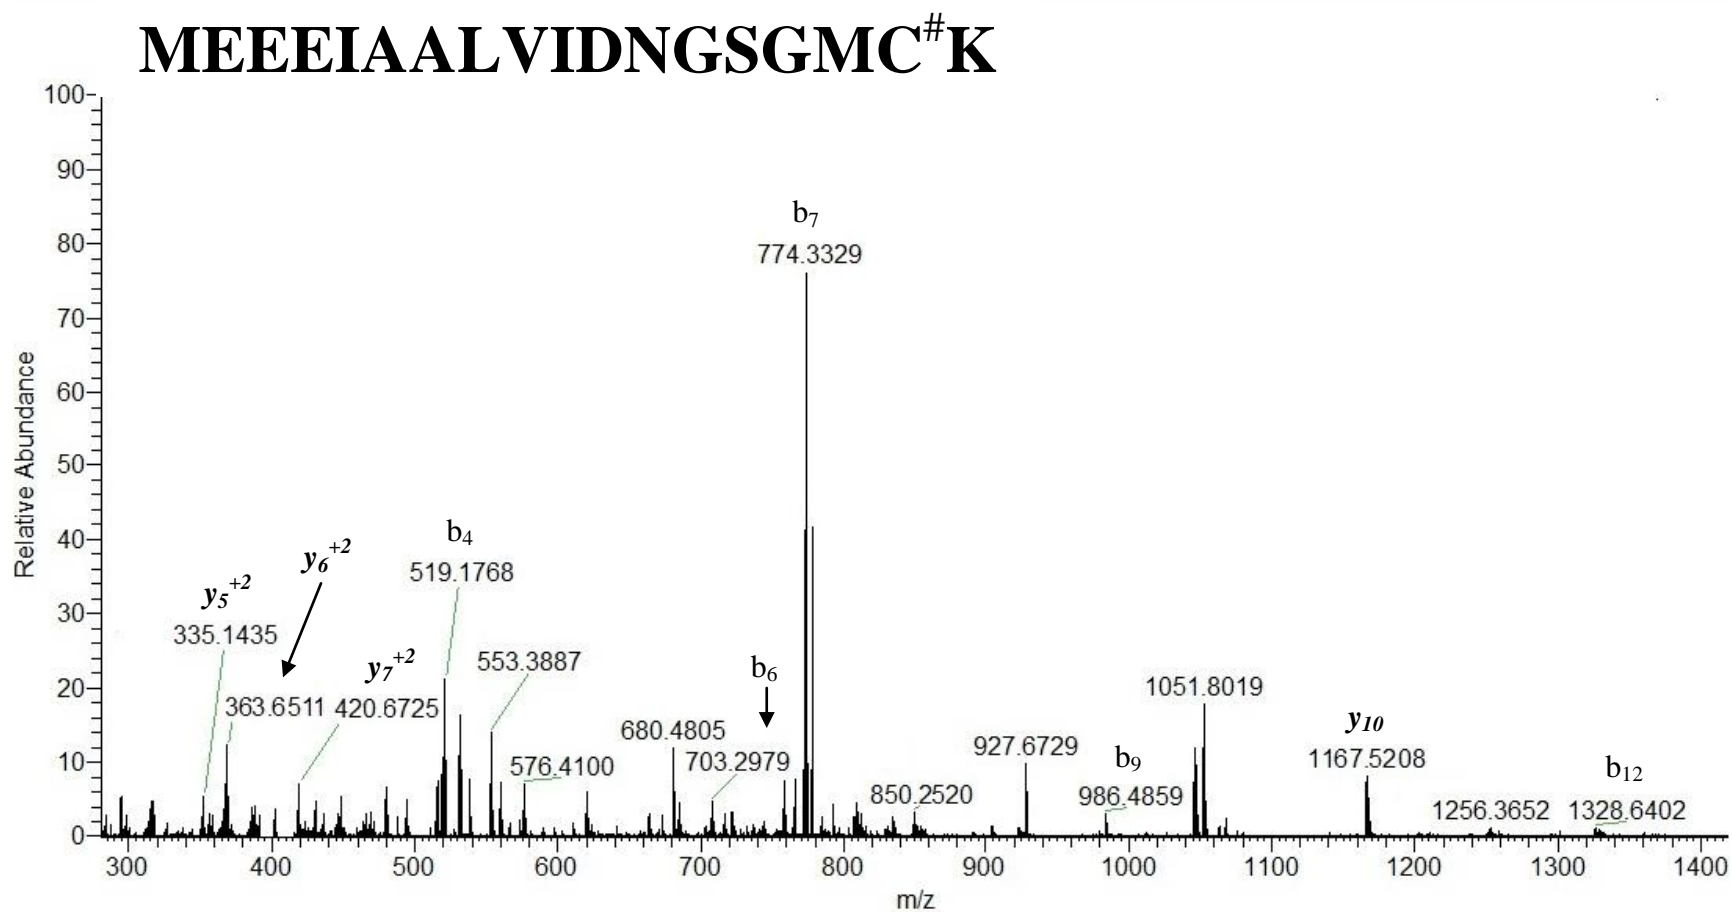

Figure S2: MS/MS of adducted actin peptide [MEEIEAALVIDNGSGMCK + NDO] at  $m/z$  1043.9679 (doubly charged).

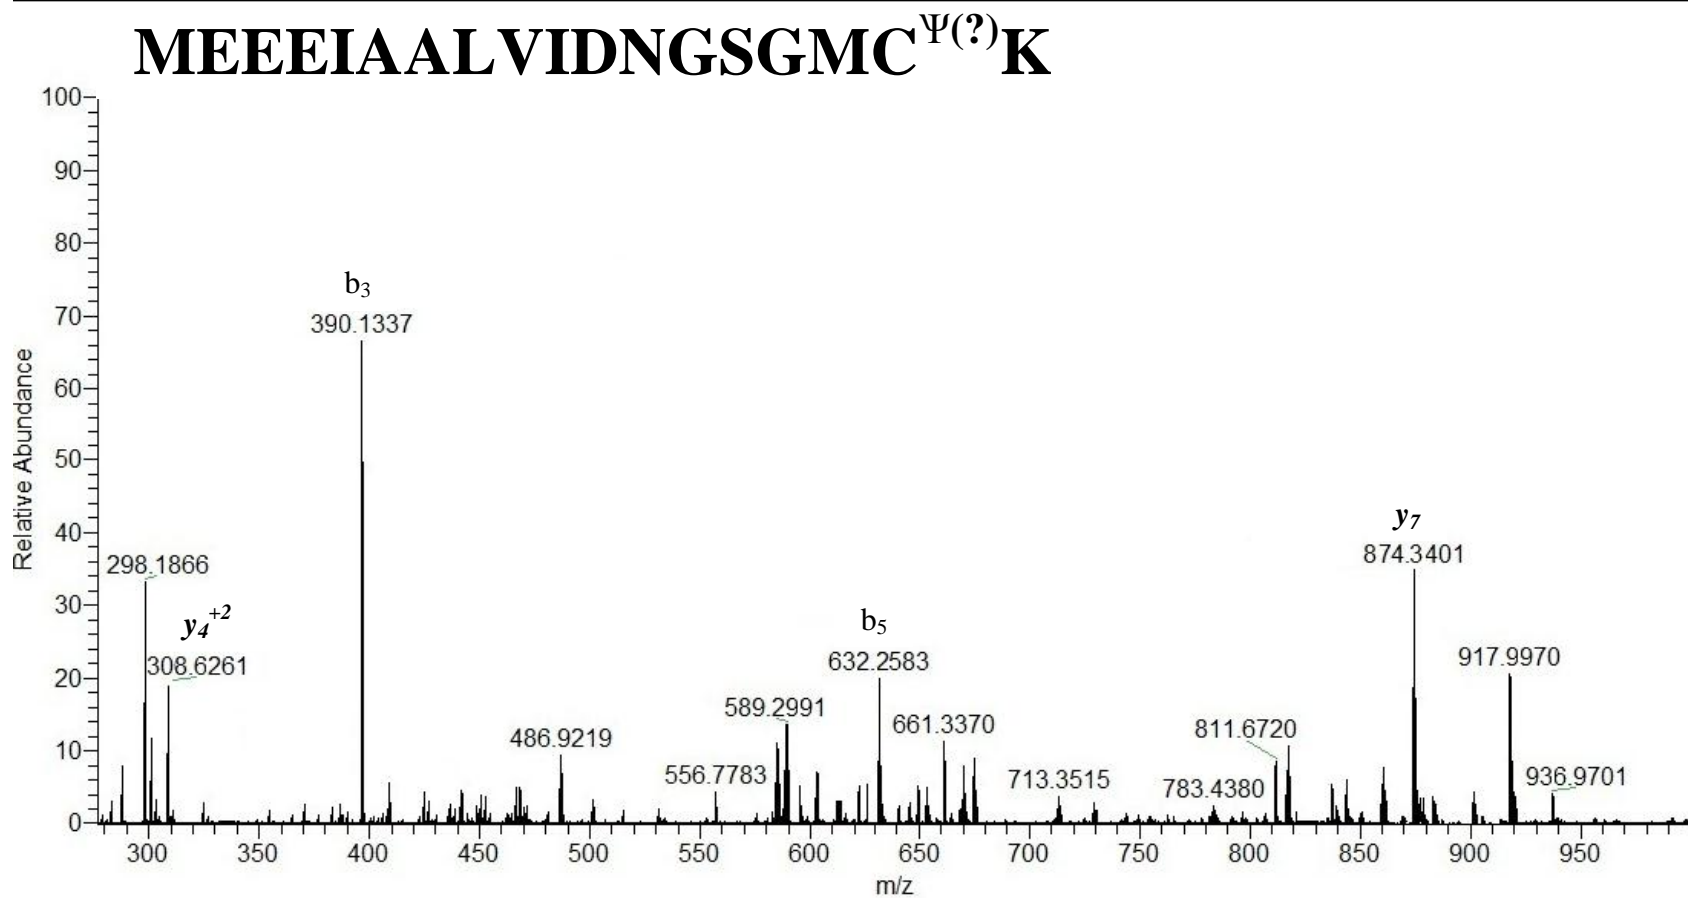

Figure S3: MS/MS of adducted actin peptide [MEEEIAALVIDNGSGMCK + 1.2NPQ] at  $m/z$  1033.9498 (doubly charged).

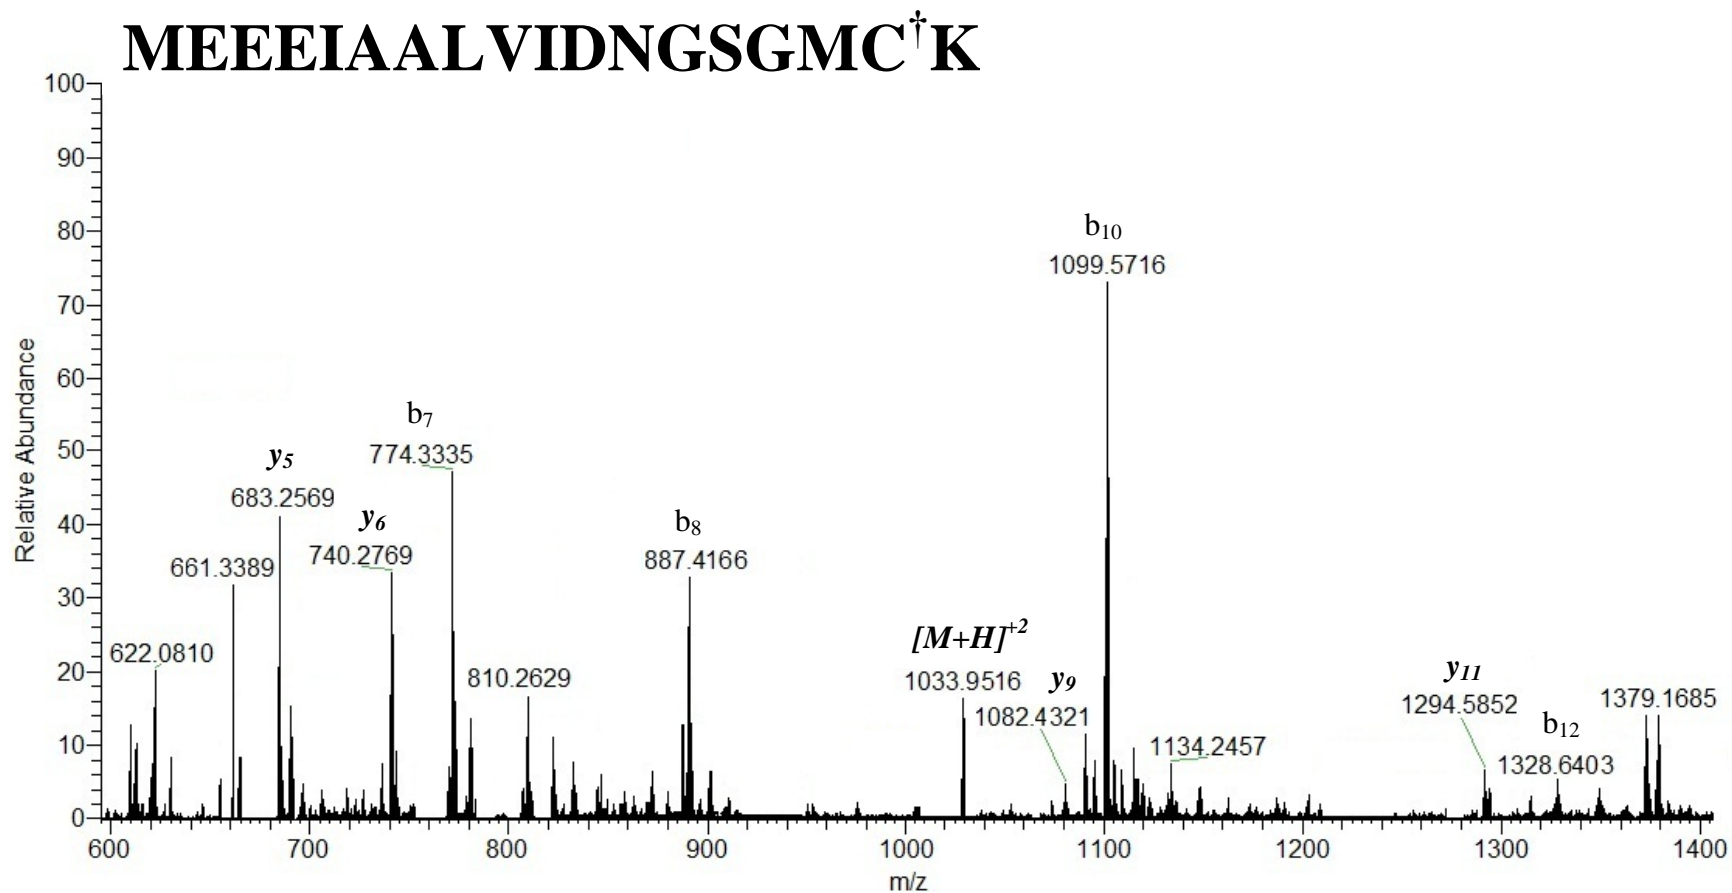

Figure S4: MS/MS of adducted actin peptide [HQGVMVGMGQK + NDO] at  $m/z$  674.8164 (doubly charged).

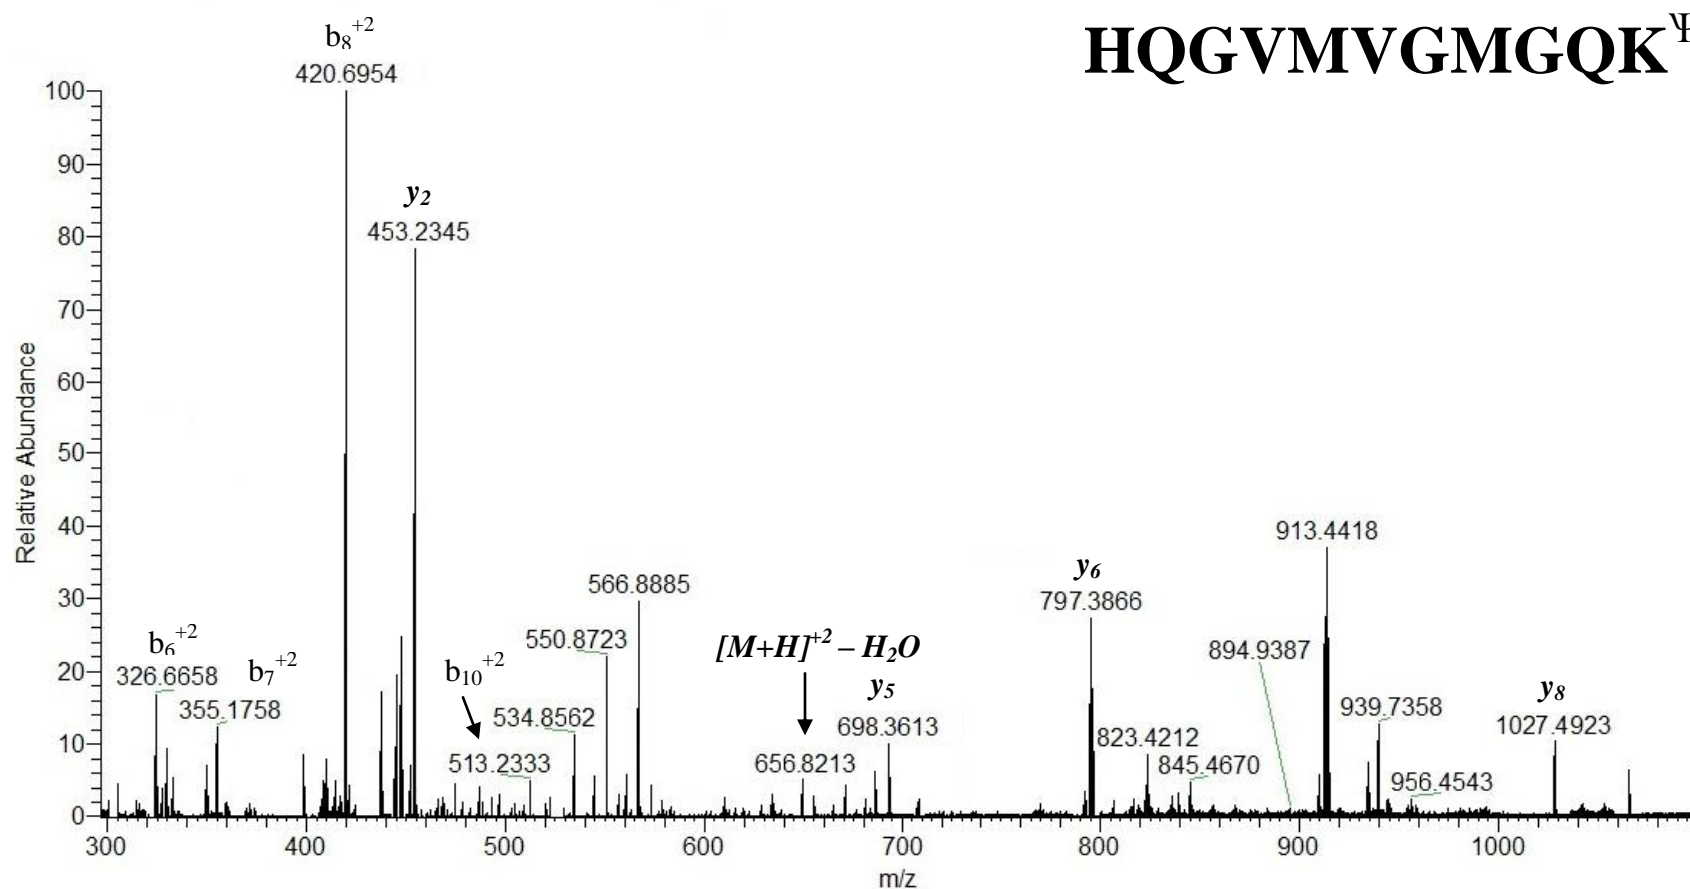

Figure S5: MS/MS of adducted actin peptide [H<sub>2</sub>QGMVGMGQK + 1,2NPQ] at  $m/z$  664.7988 (doubly charged).

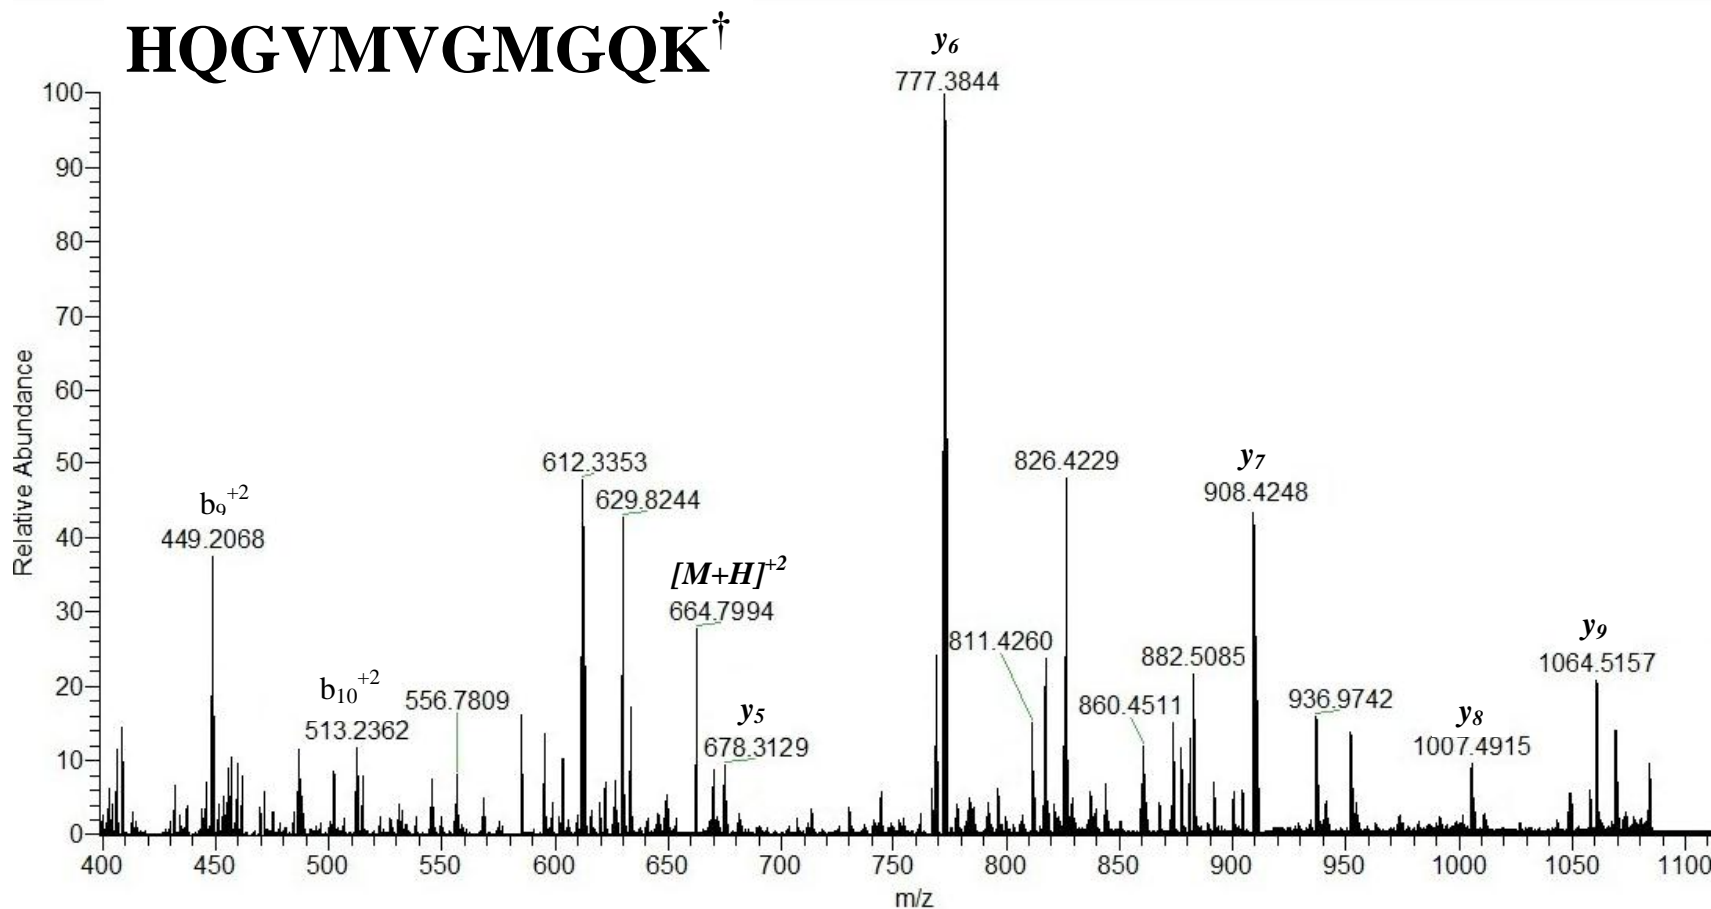

Figure S6: MS/MS of adducted actin peptide [H<sub>9</sub>QVMVGMGQK + 1,4NPQ] at  $m/z$  664.7988 (doubly charged).

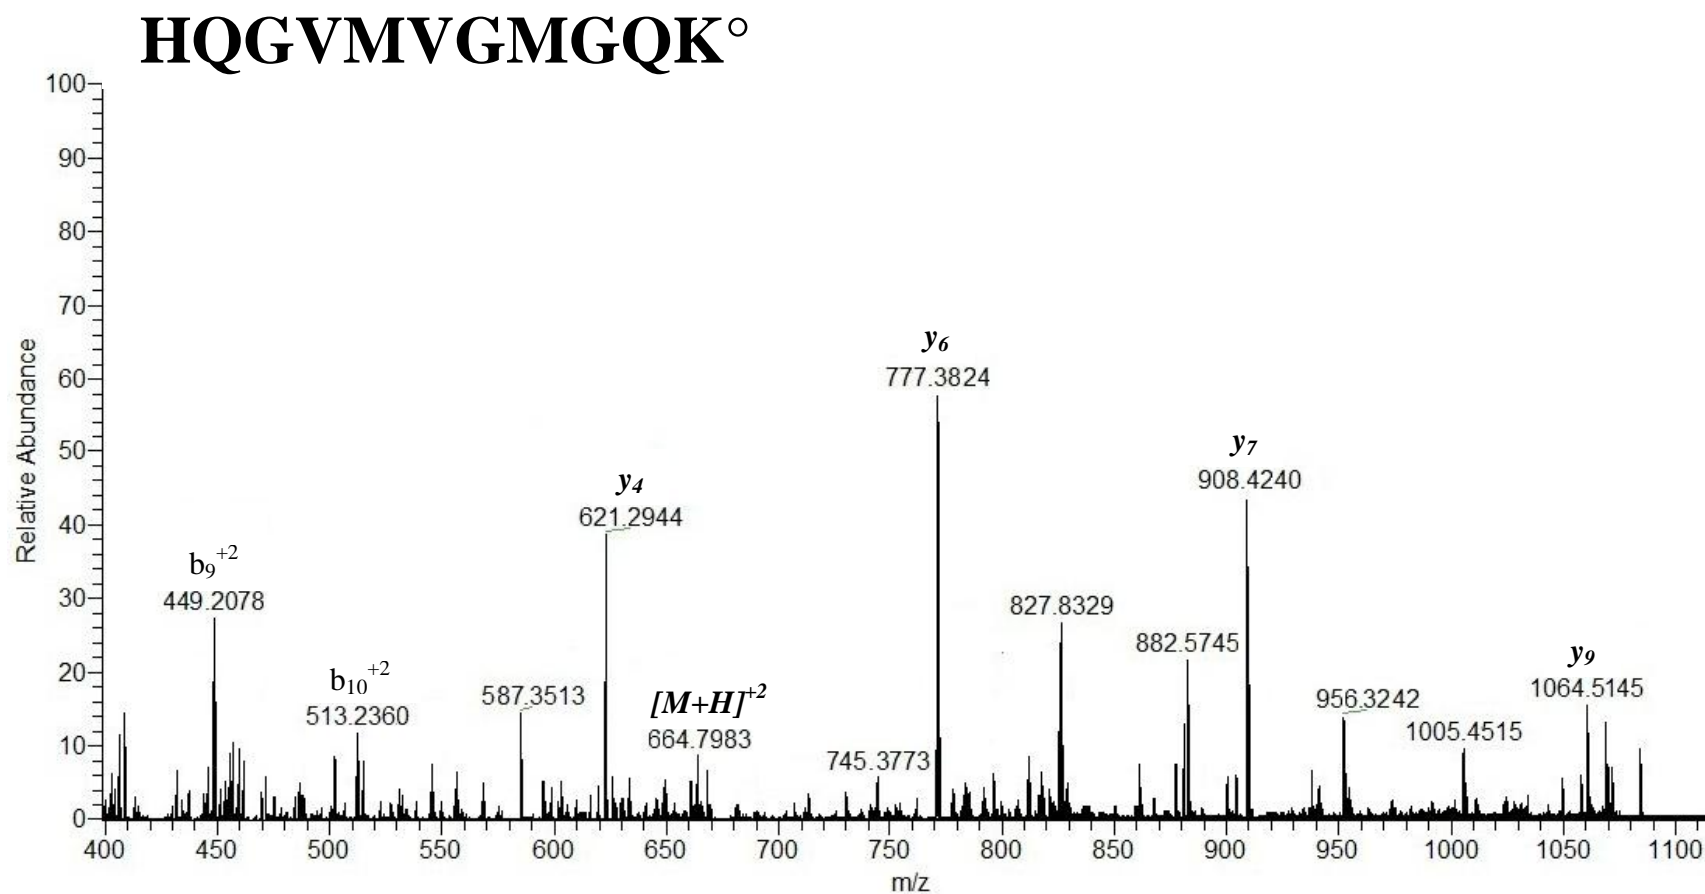



Figure S7: MS/MS of adducted actin peptide [GILTLK + 1,4NPQ] at  $m/z$  802.4601.

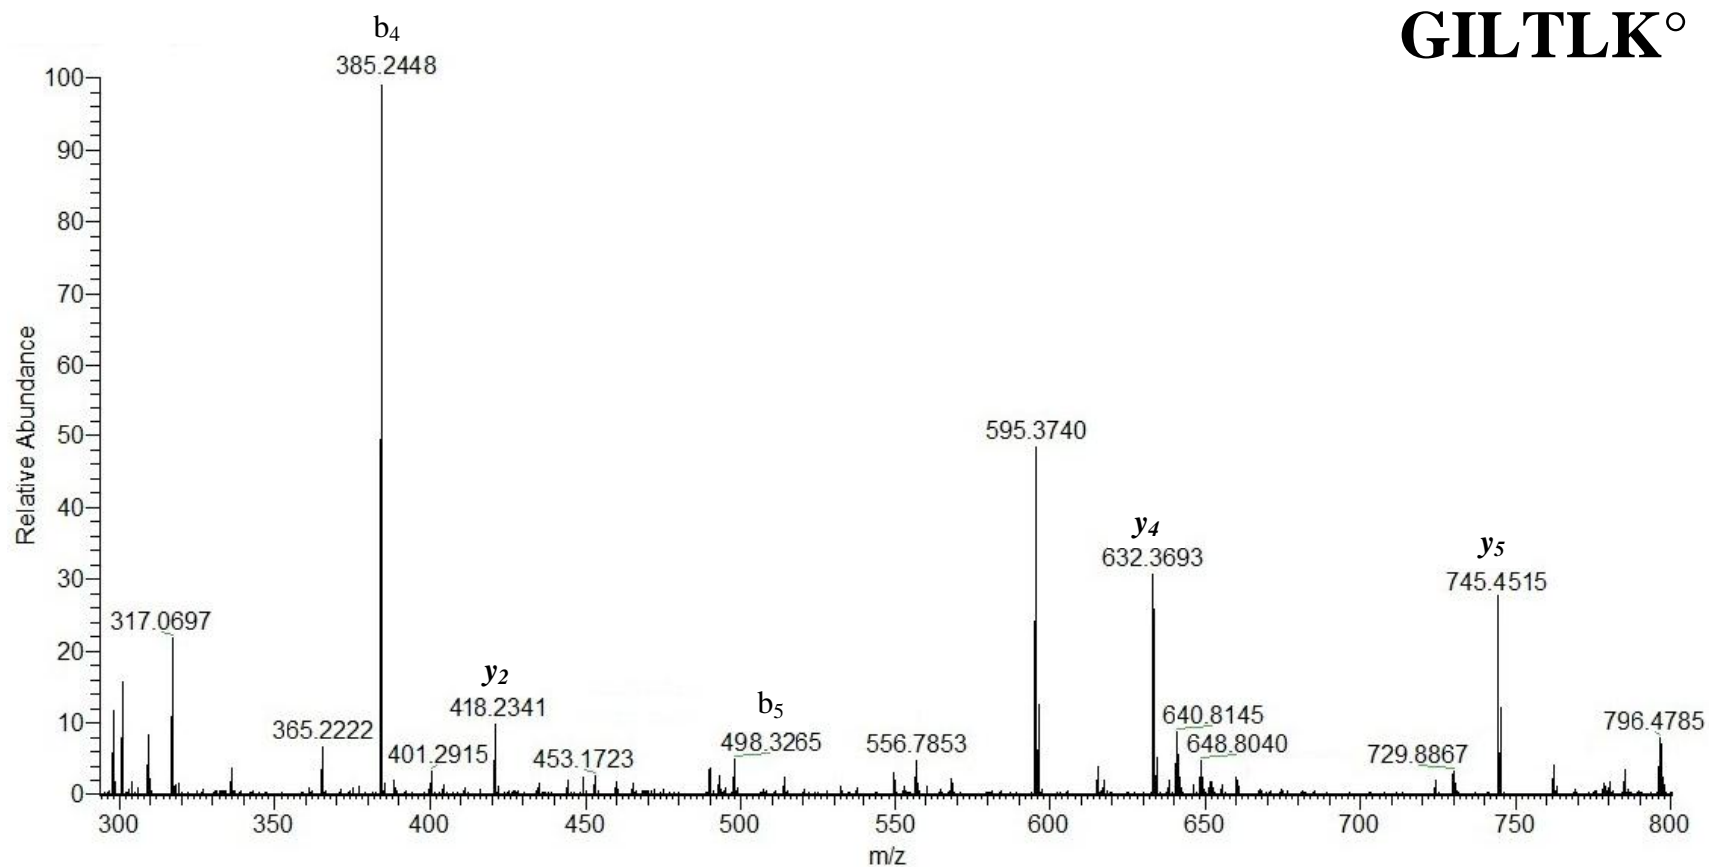

**GILTLK<sup>o</sup>**

Figure S8: MS/MS of adducted actin peptide [IWHHTFYNELR + 1,2NPQ] at  $m/z$  836.8874 (doubly charged).

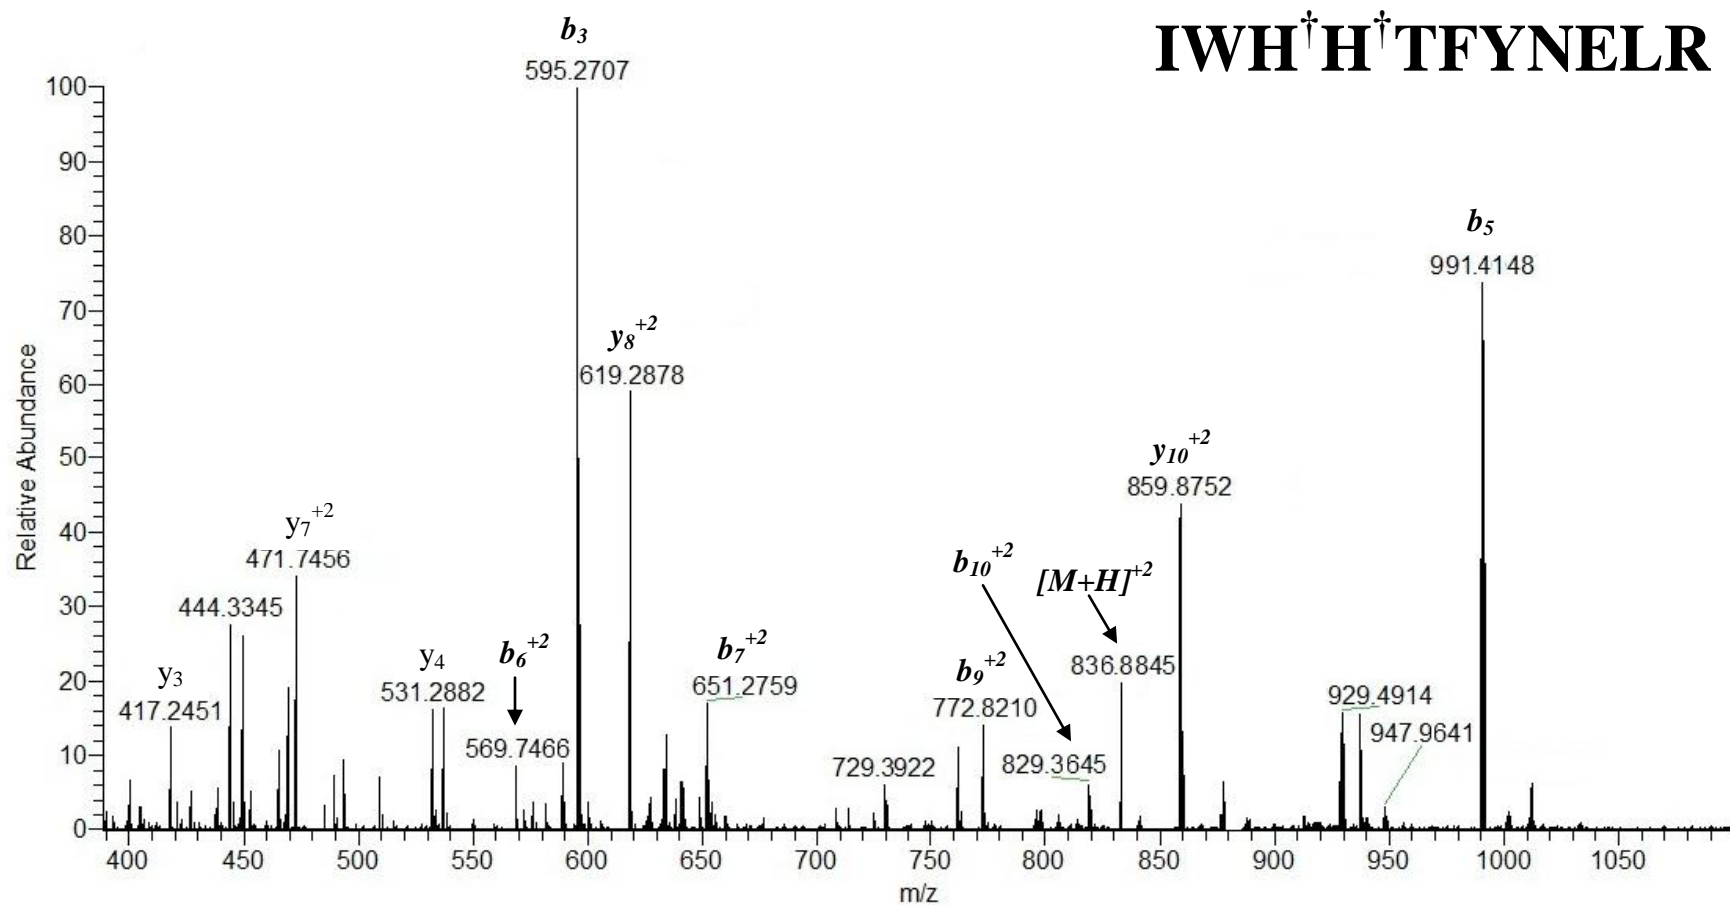

Figure S9: MS/MS of adducted actin peptide [VAPEEHPVLLTEAPLNPK + NDO] at  $m/z$  1066.0590 (doubly charged).

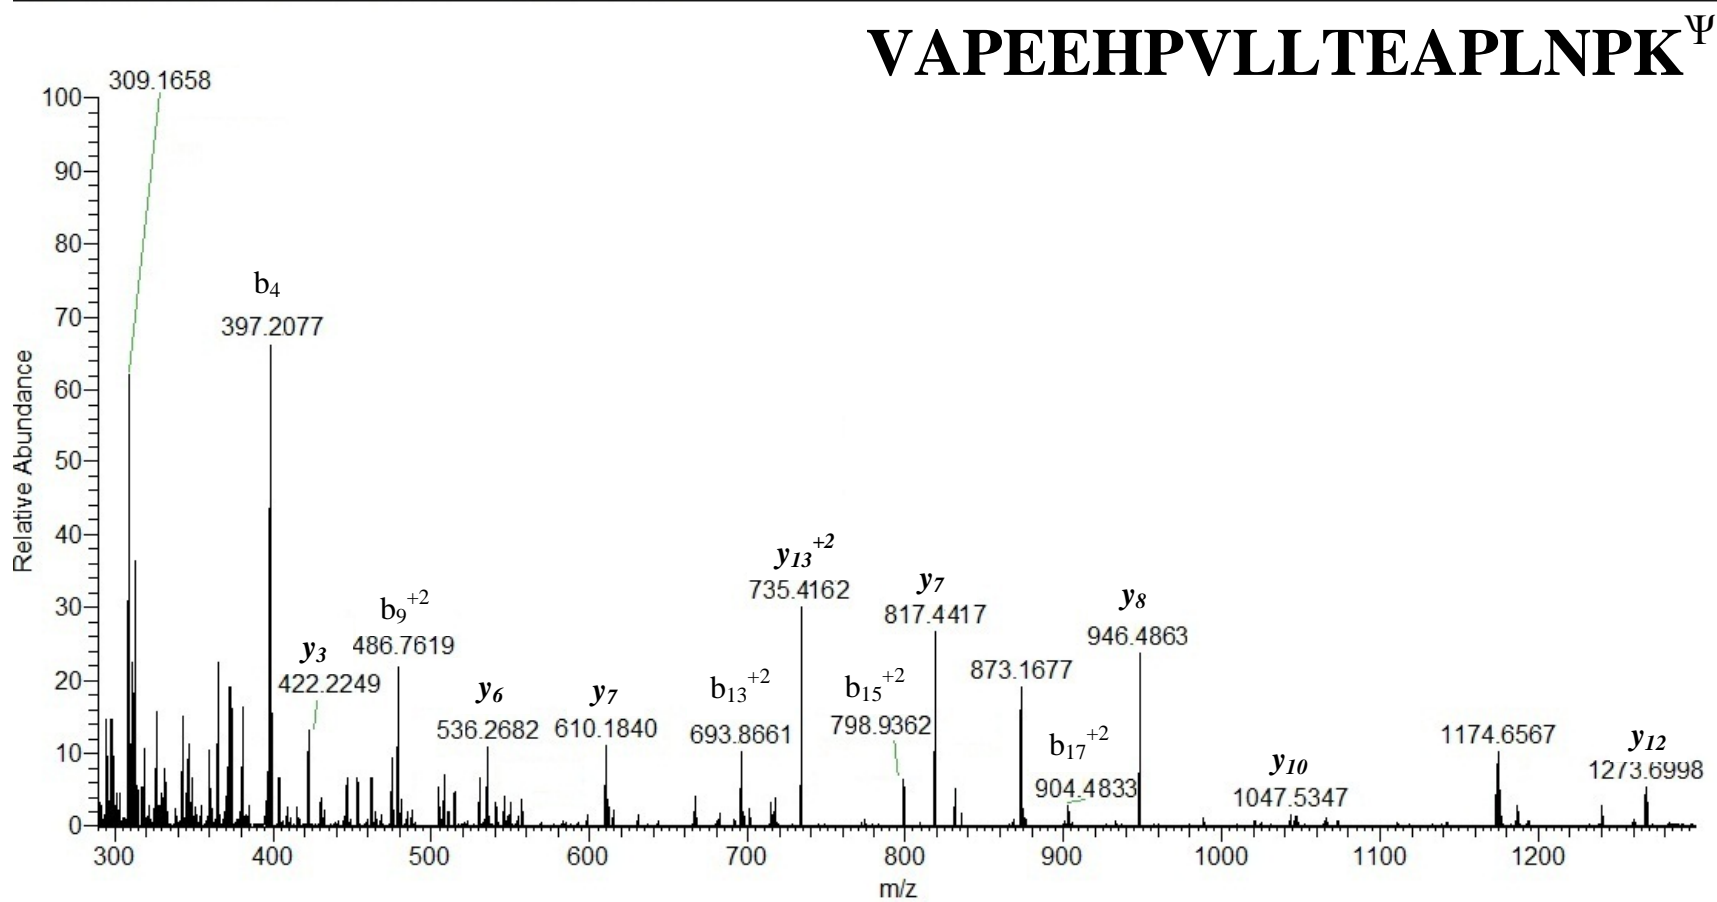

Figure S10: MS/MS of adducted actin peptide [DLTDYLMKILTER + NPO] at  $m/z$  996.5738 (doubly charged).

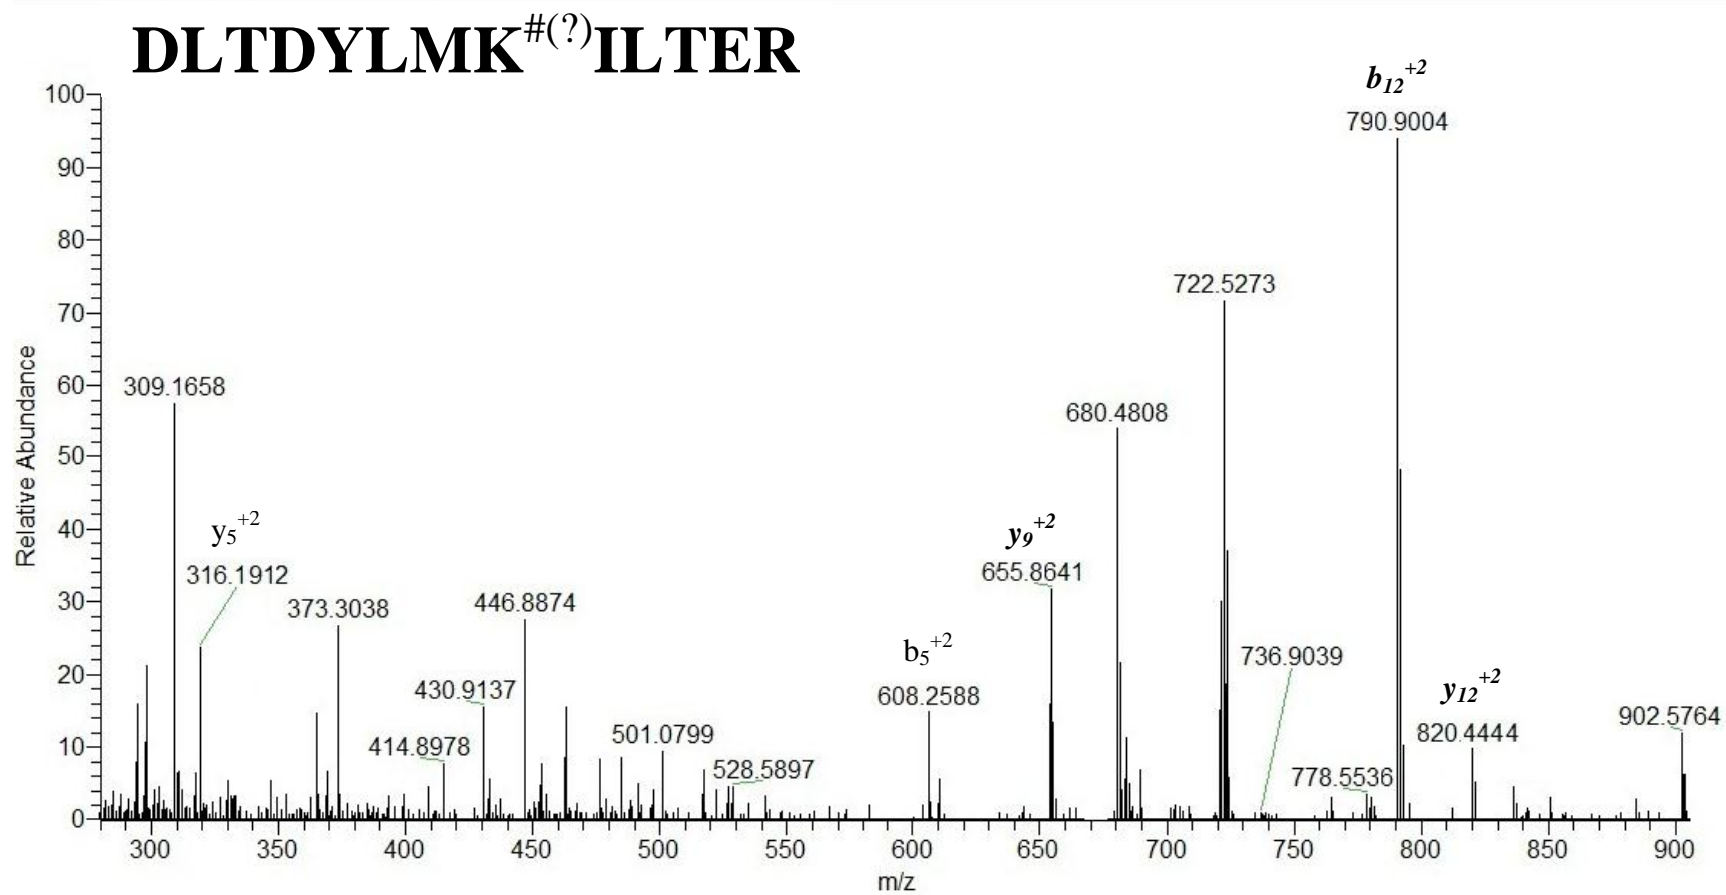

Figure S11: MS/MS of adducted actin peptide [DIKEK + 1,4NPQ] at  $m/z$  790.3892.

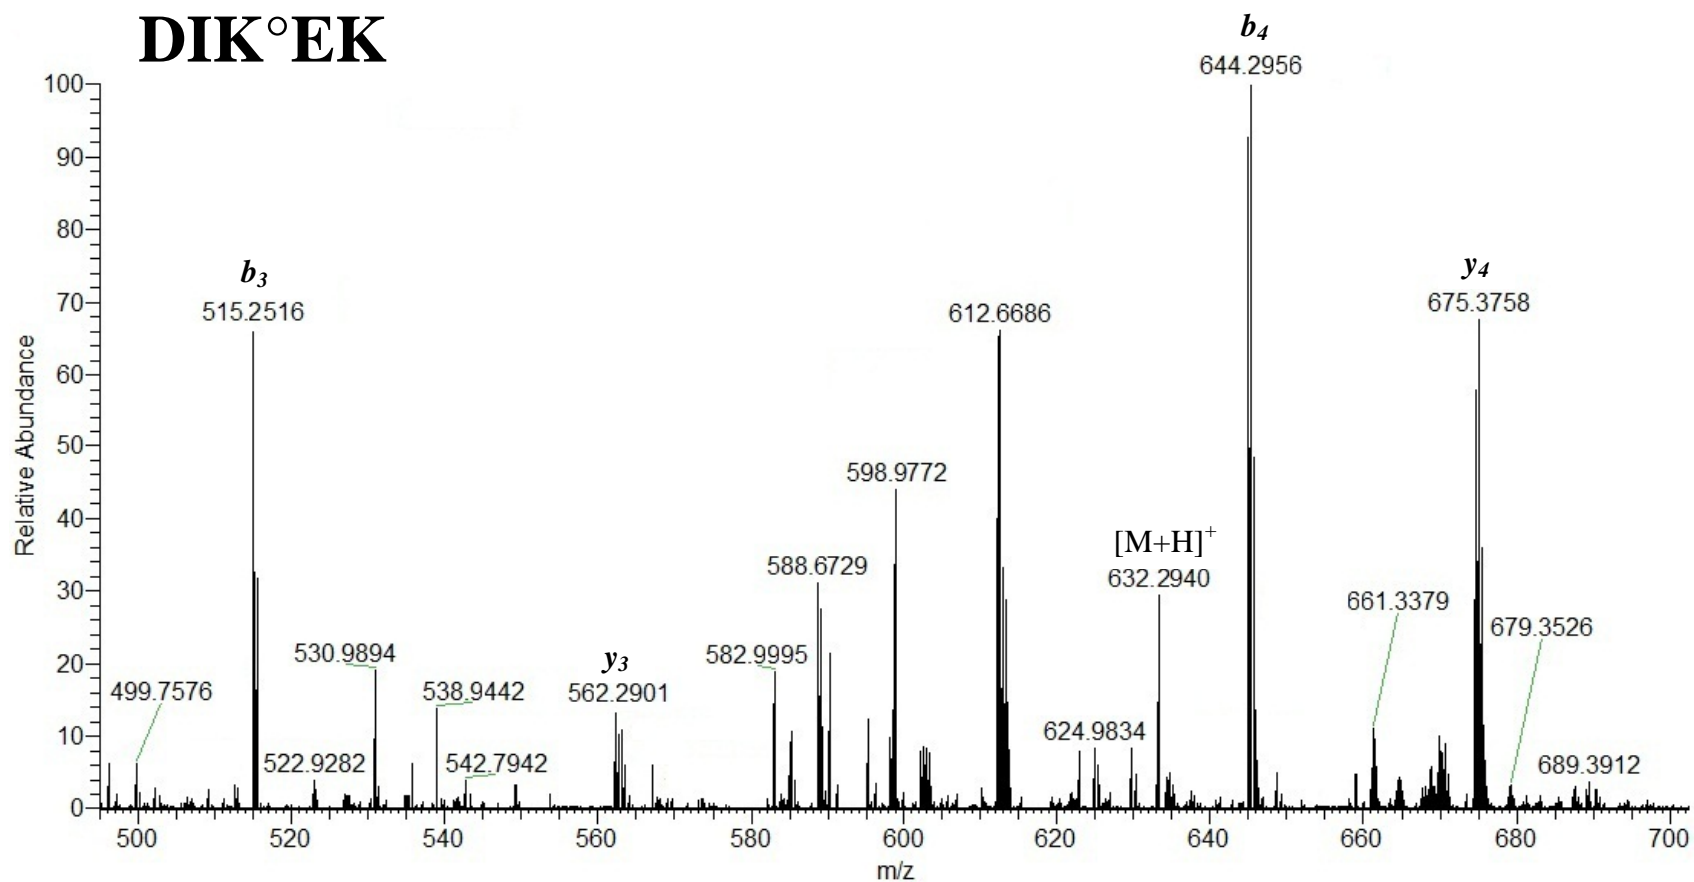

Figure S12: MS/MS of adducted actin peptide [CPEALFQPSFLGMESC<sup>†(?)</sup>GIHETTFNSIMK + 1,2NPQ] at  $m/z$  1091.8143 (triply charged).

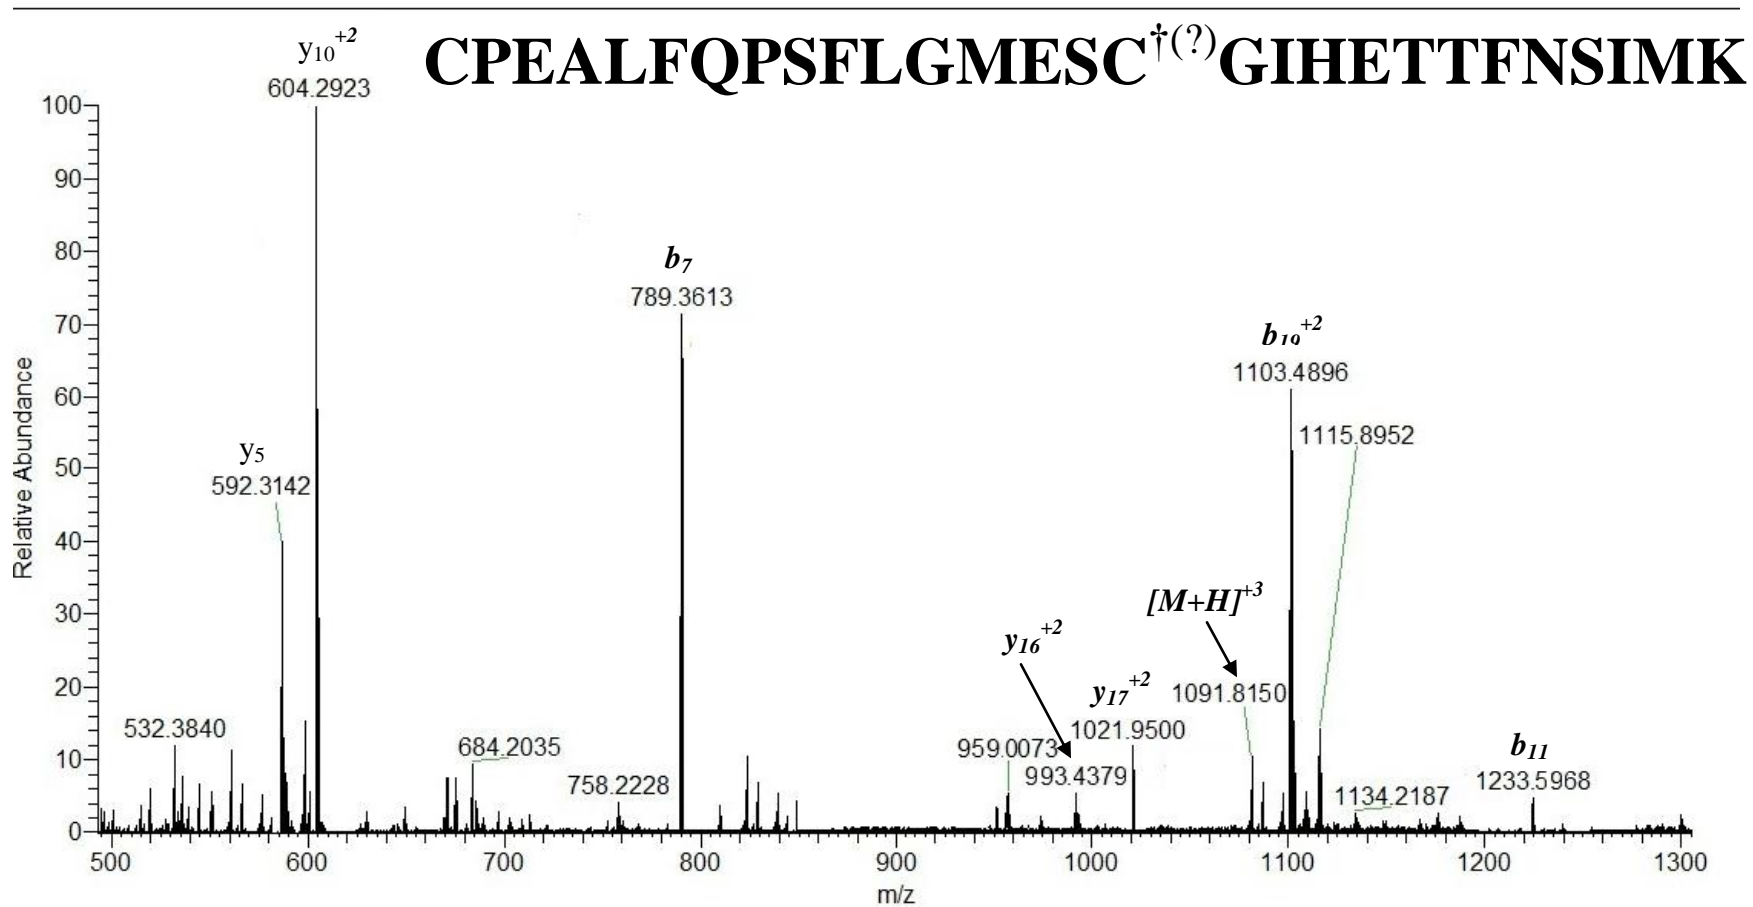

Figure S13: MS/MS of adducted actin peptide [IKIIAPPER + NPO] at  $m/z$  590.3488 (doubly charged).

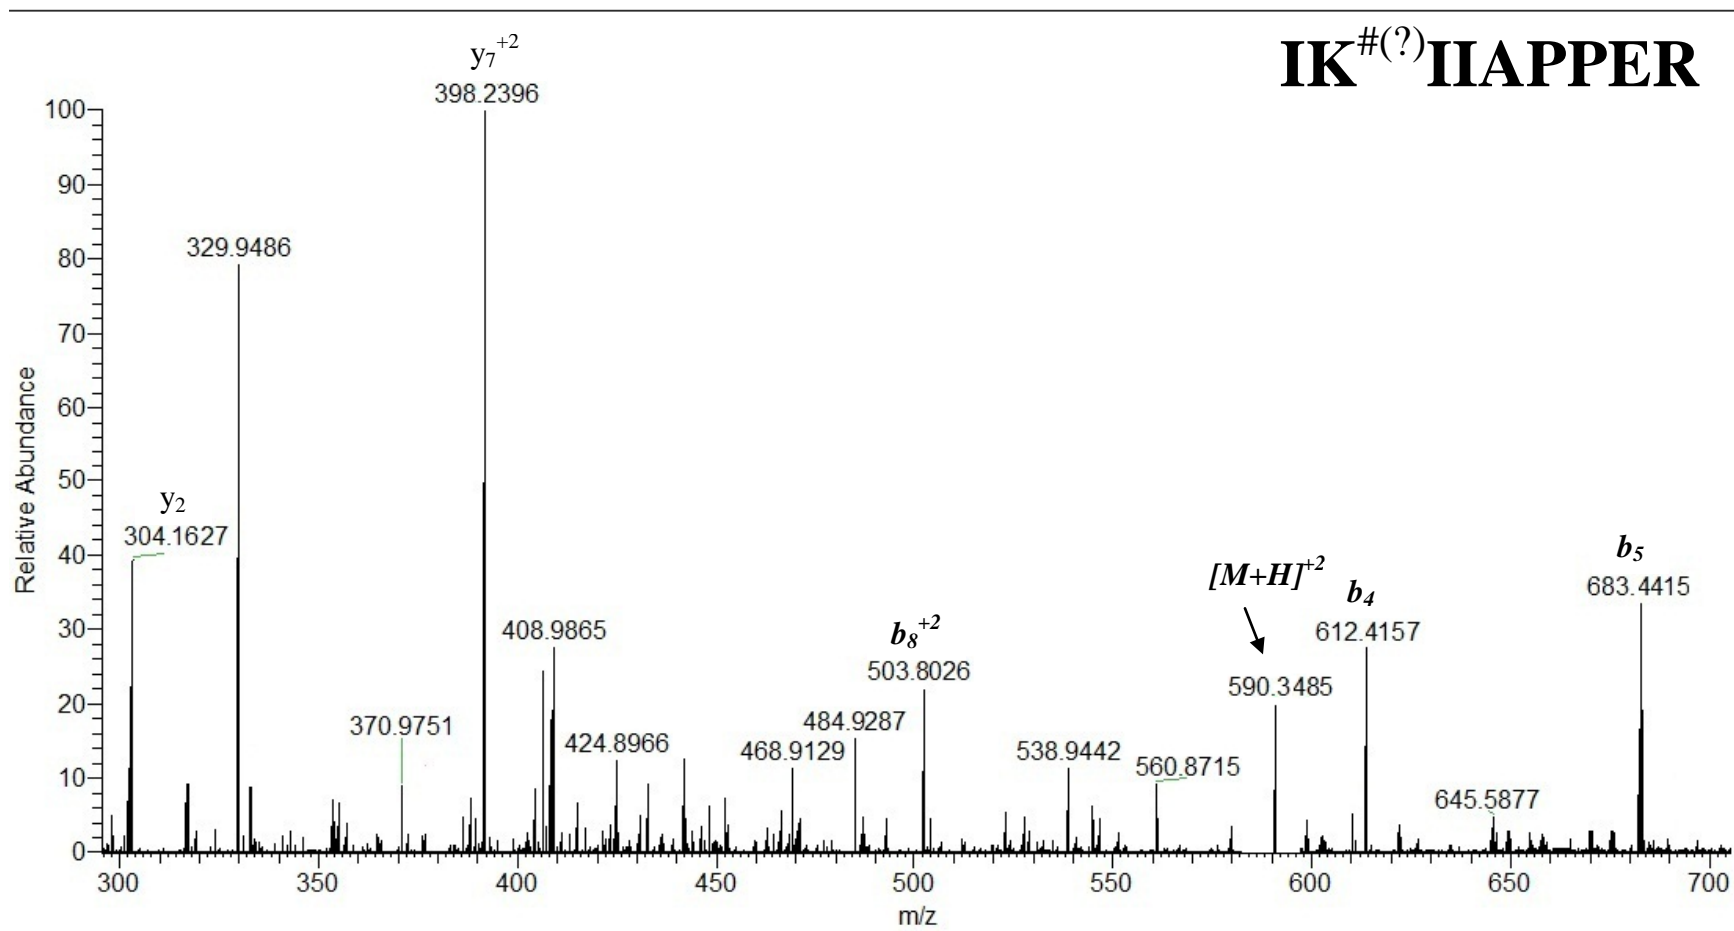

Figure S14: MS/MS of adducted PDI peptide [MLSRALLCLALAWAAR + NPO] at  $m/z$  951.5223 (doubly charged).

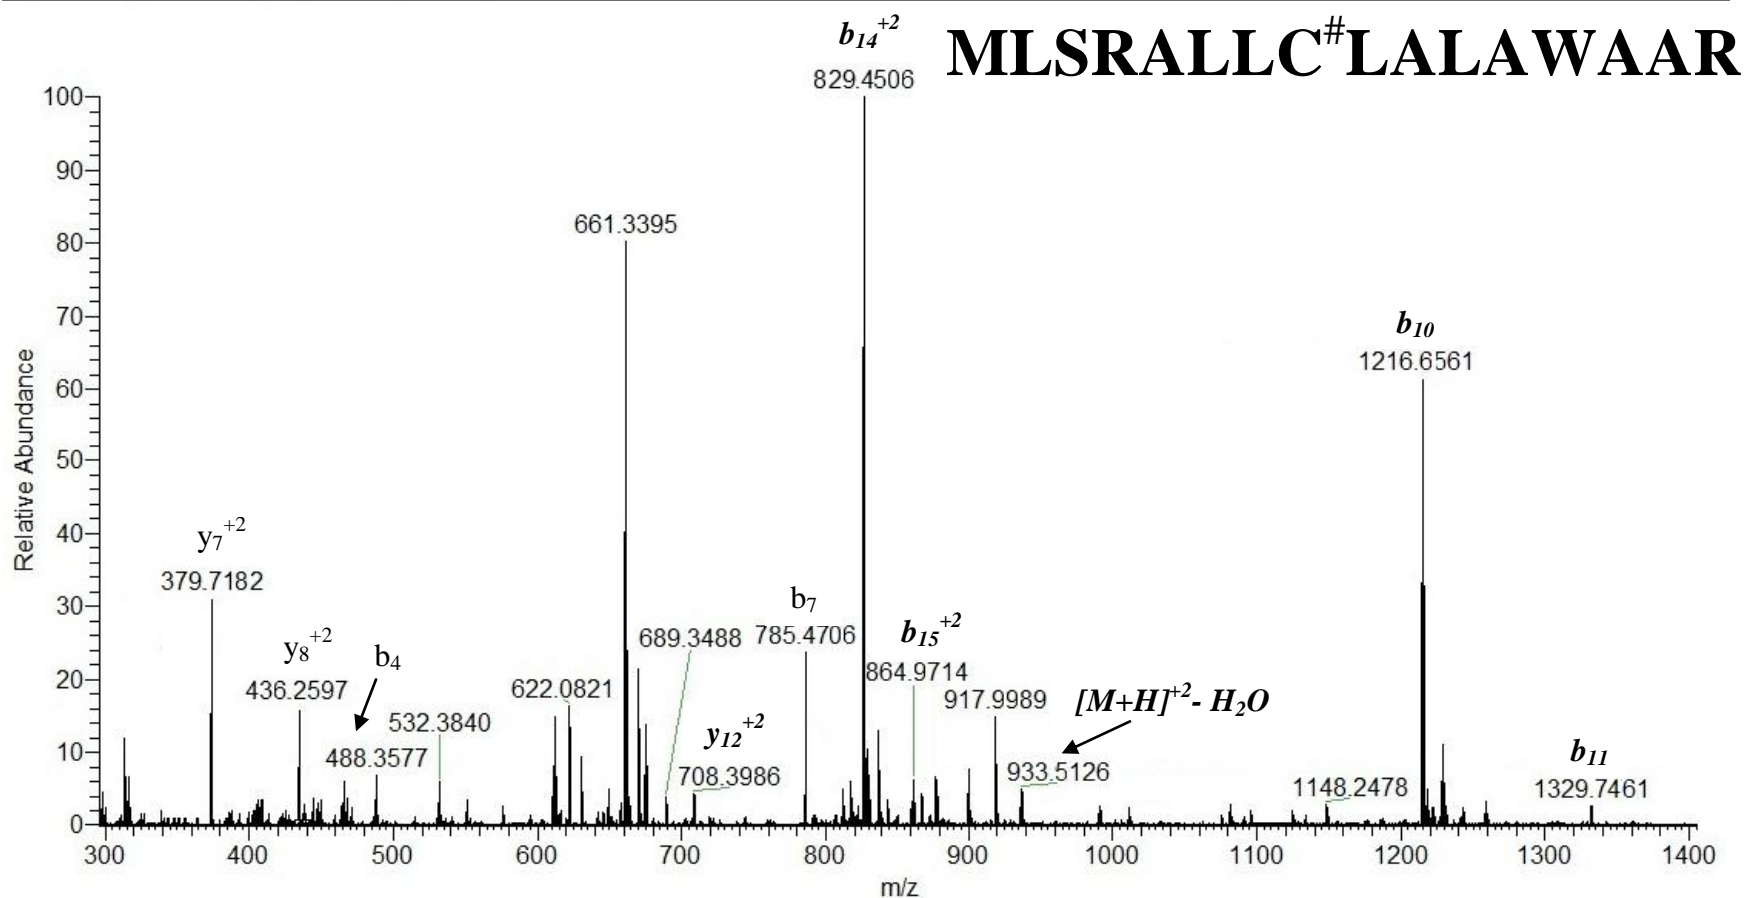



Figure S15: MS/MS of adducted PDI peptide [YLLVEFYAPWCGHCK + NDO] at  $m/z$  1003.9616 (doubly charged).

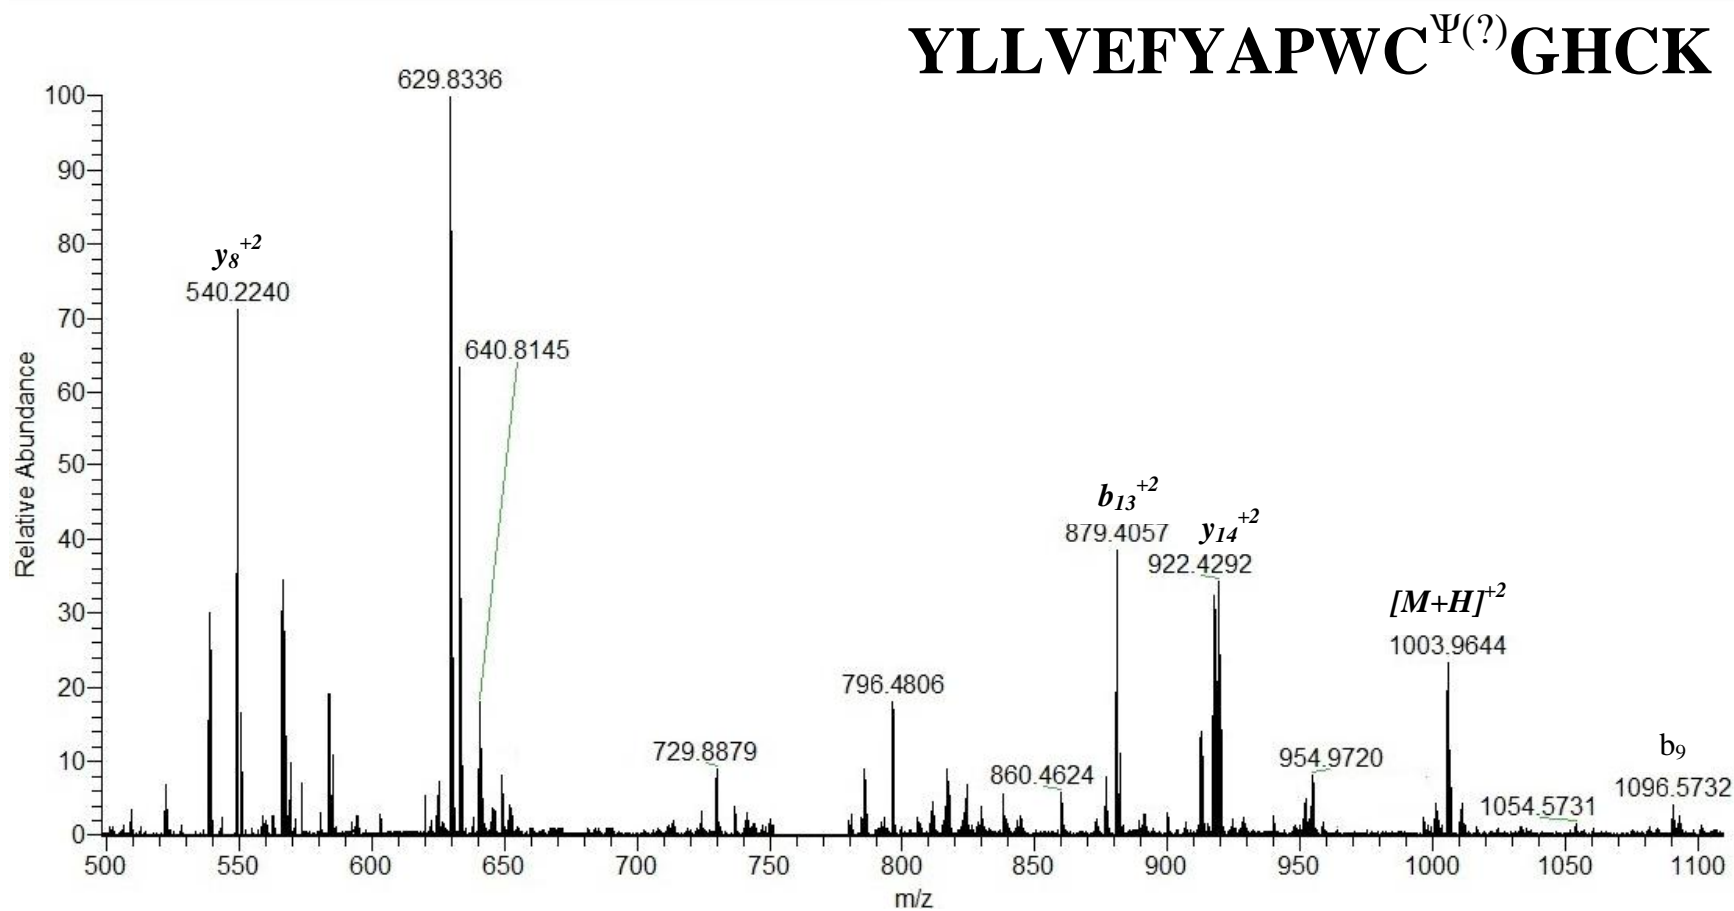

Figure S16: MS/MS of adducted PDI peptide [EADDIVNWLK + 1,2NPQ] at  $m/z$  1360.6425.

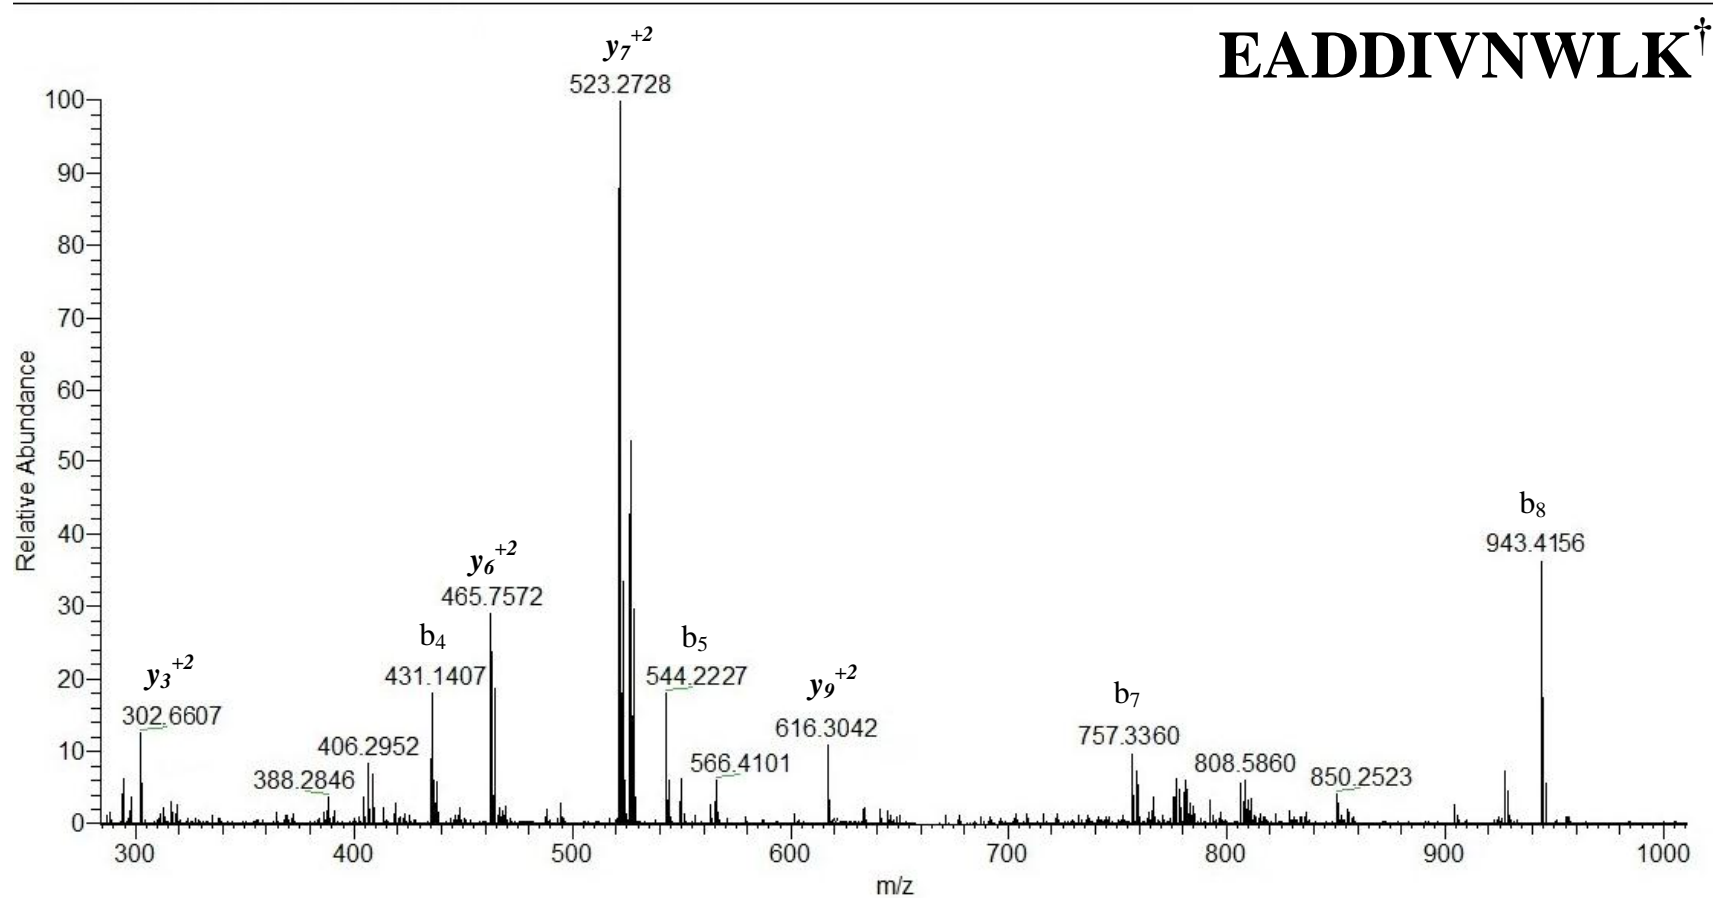

Figure S17: MS/MS of adducted PDI peptide [TGPAATLSDTAAAESLVDSSEVTVIGFFK + NDO] at  $m/z$  1581.7780 (doubly charged).

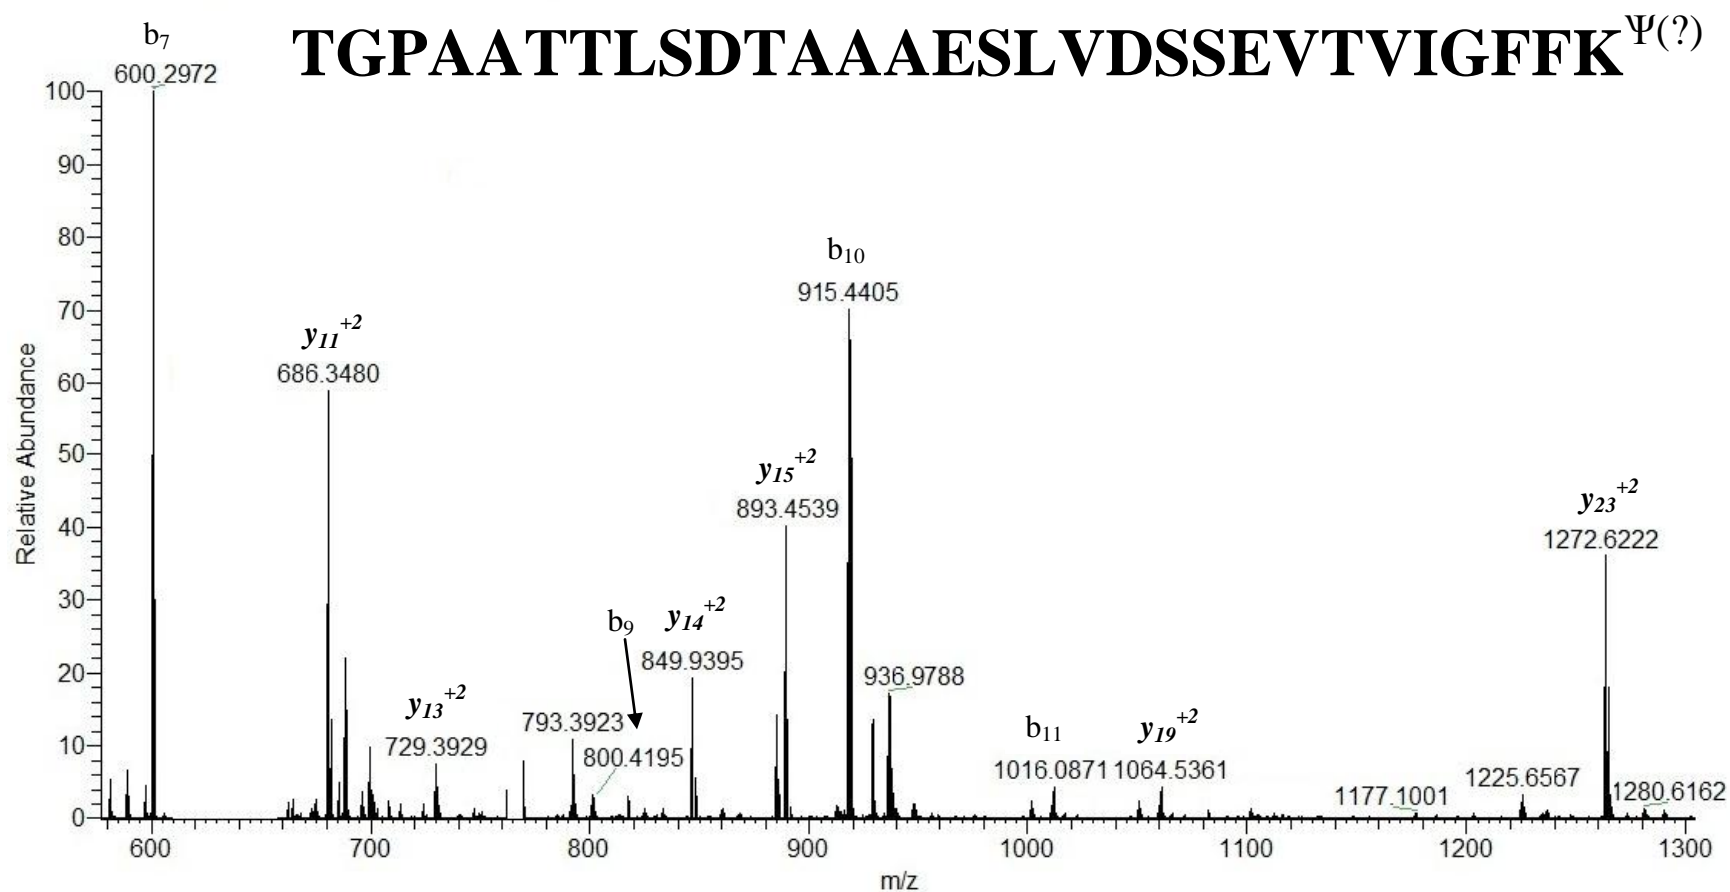

Figure S18: MS/MS of adducted PDI peptide [TGPAATLSDTAAAESLVDSSEVTVIGFFK + 1,2NPQ] at  $m/z$  1571.7659 (doubly charged).

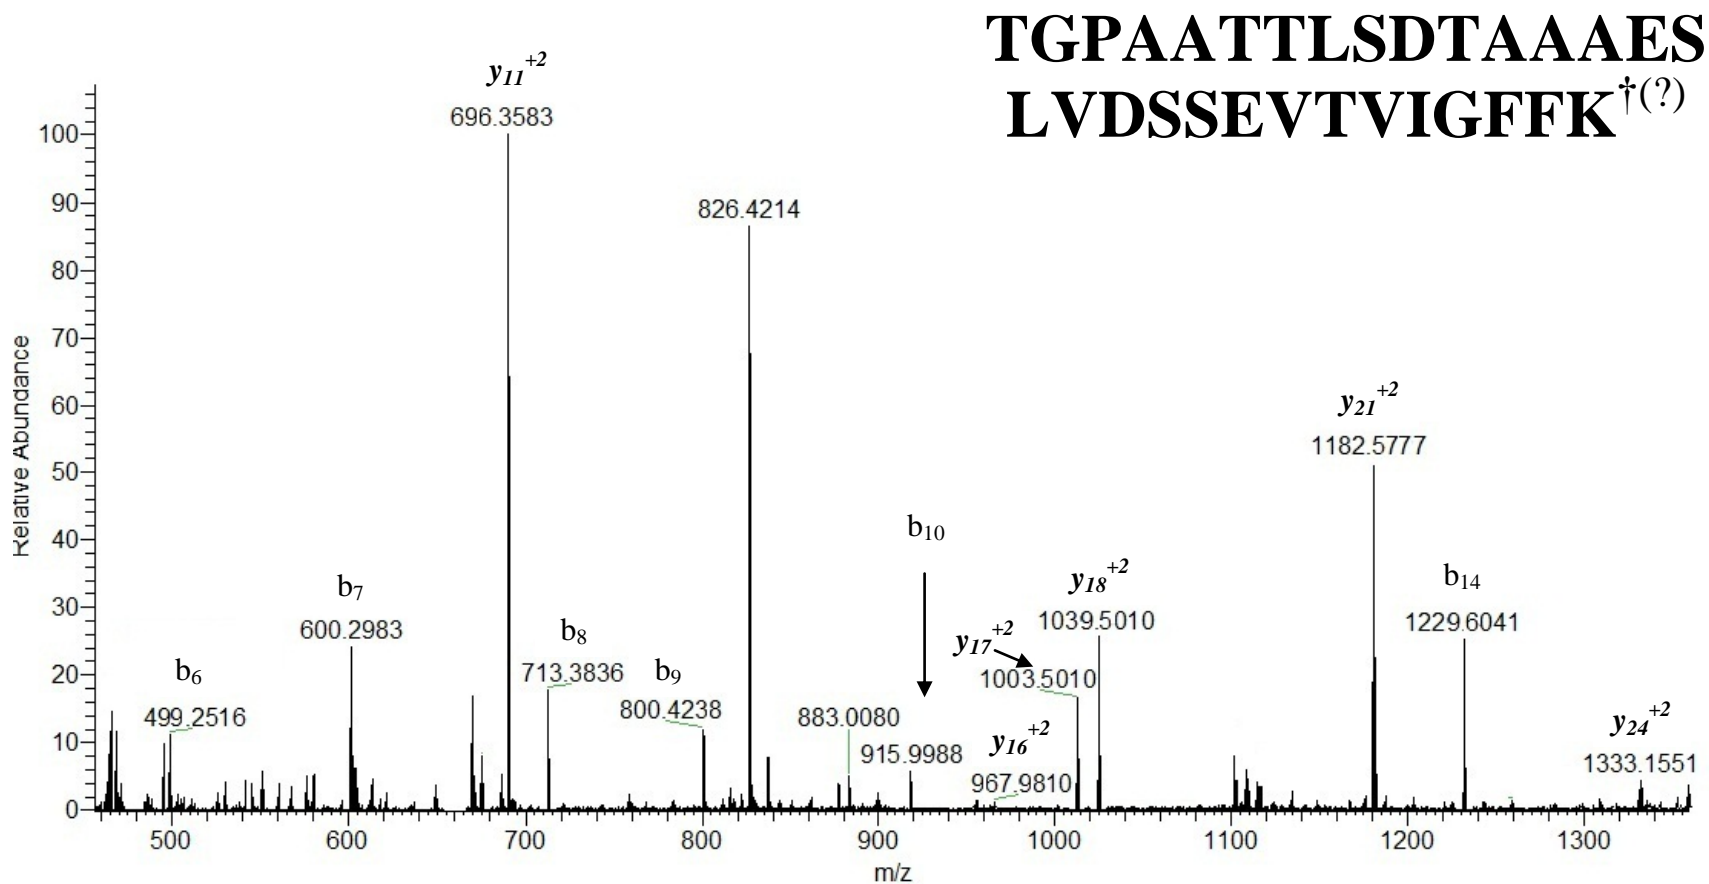

Figure S19: MS/MS of adducted PDI peptide [DVESDSAK + NPO] at  $m/z$  994.4379.

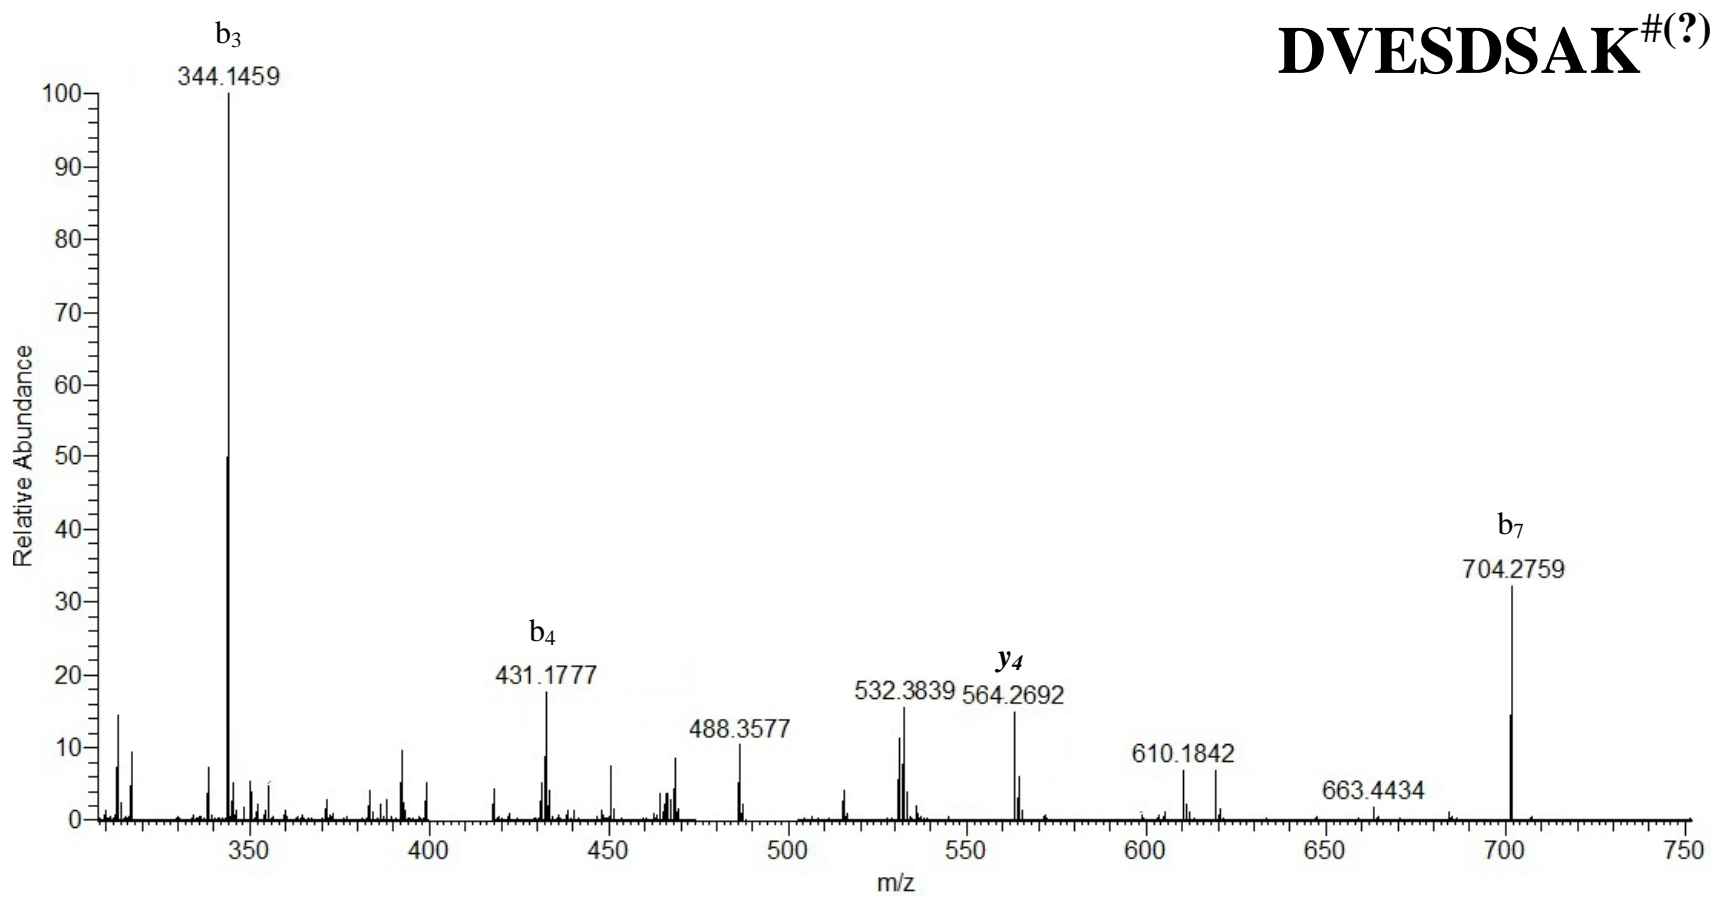

Figure S20: MS/MS of adducted PDI peptide [THILLFLPK + NDO] at  $m/z$  1259.7401.

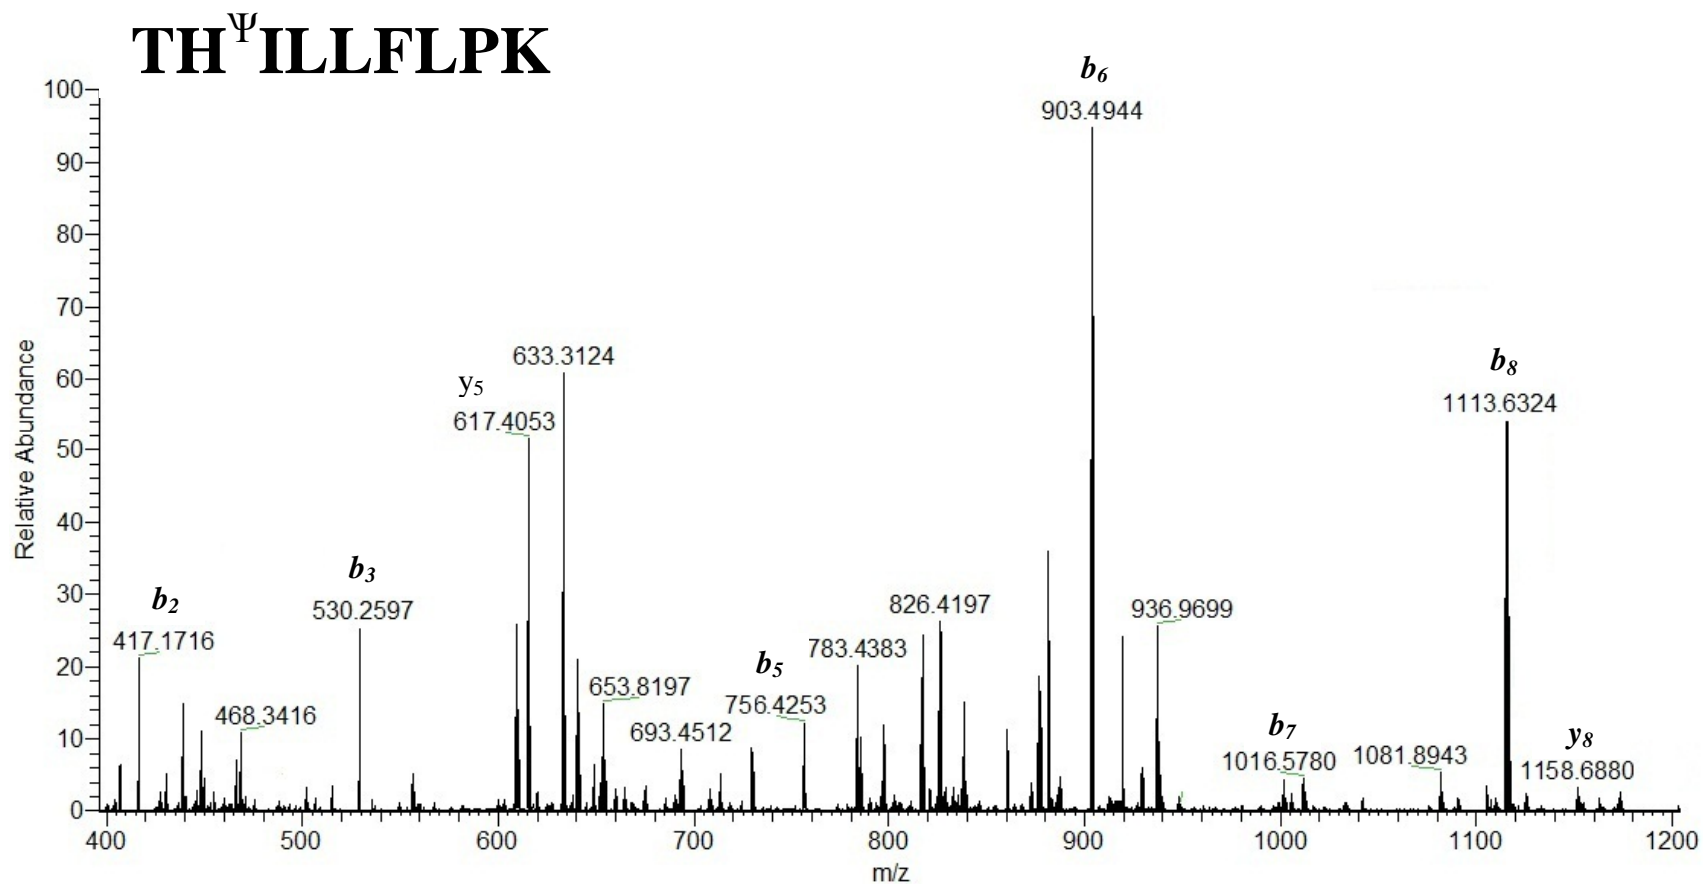

Figure S21: MS/MS of adducted PDI peptide [THILLFLPK + 1,2NPQ] at  $m/z$  1397.7574.

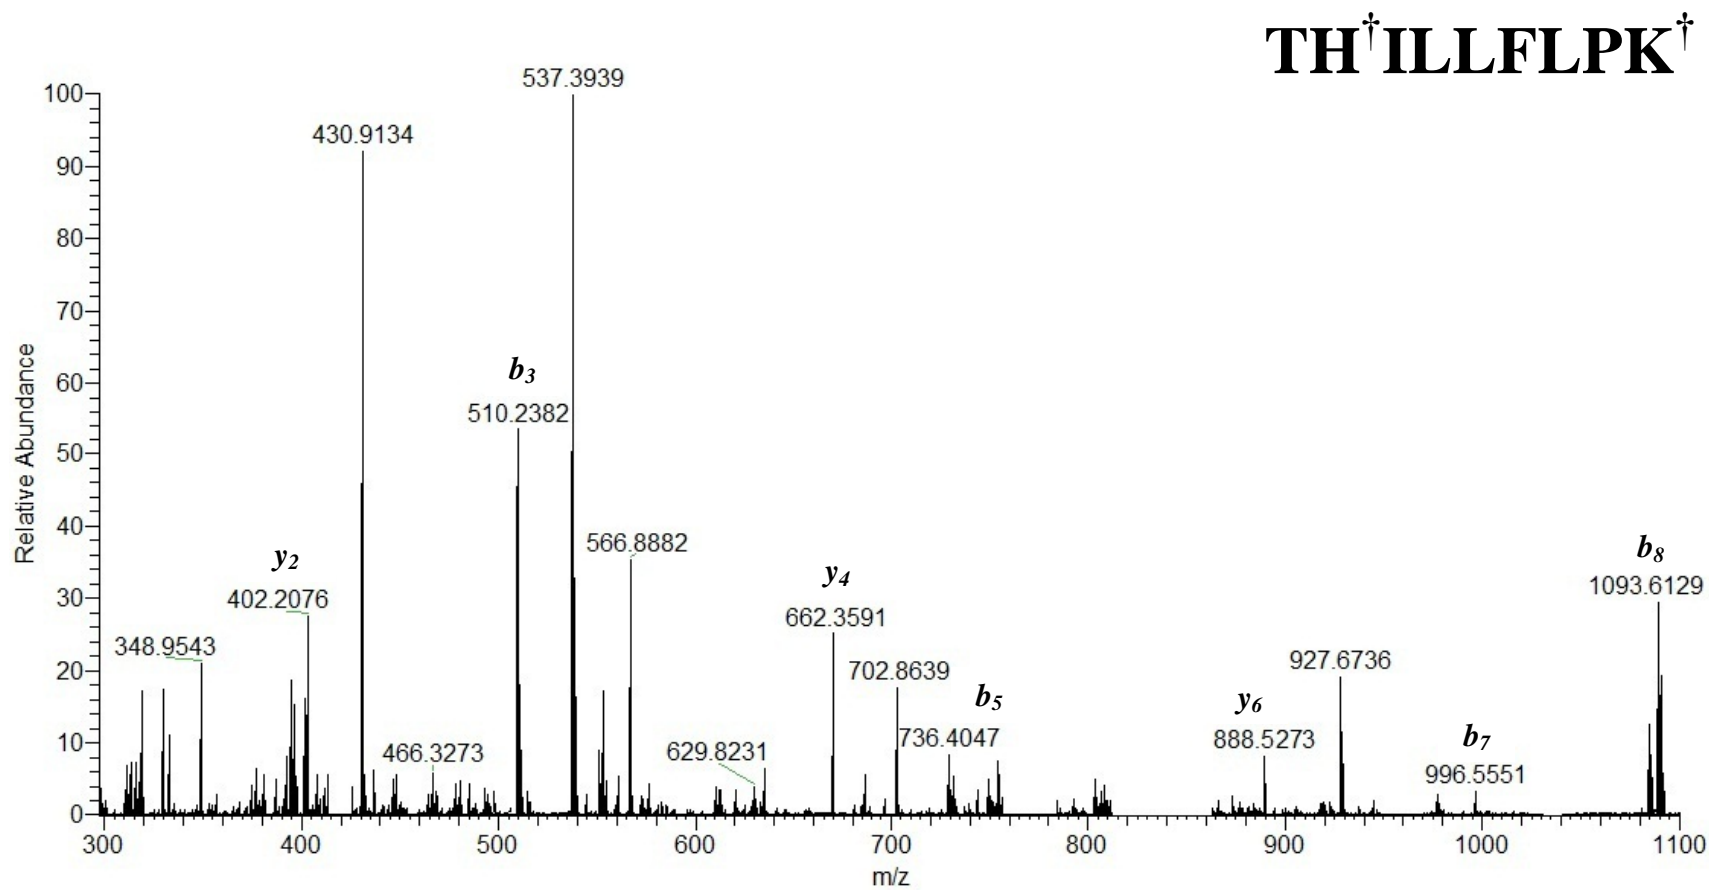

Figure S22: MS/MS of adducted PDI peptide [AAEGFK + 1,4NPQ] at  $m/z$  780.3569.

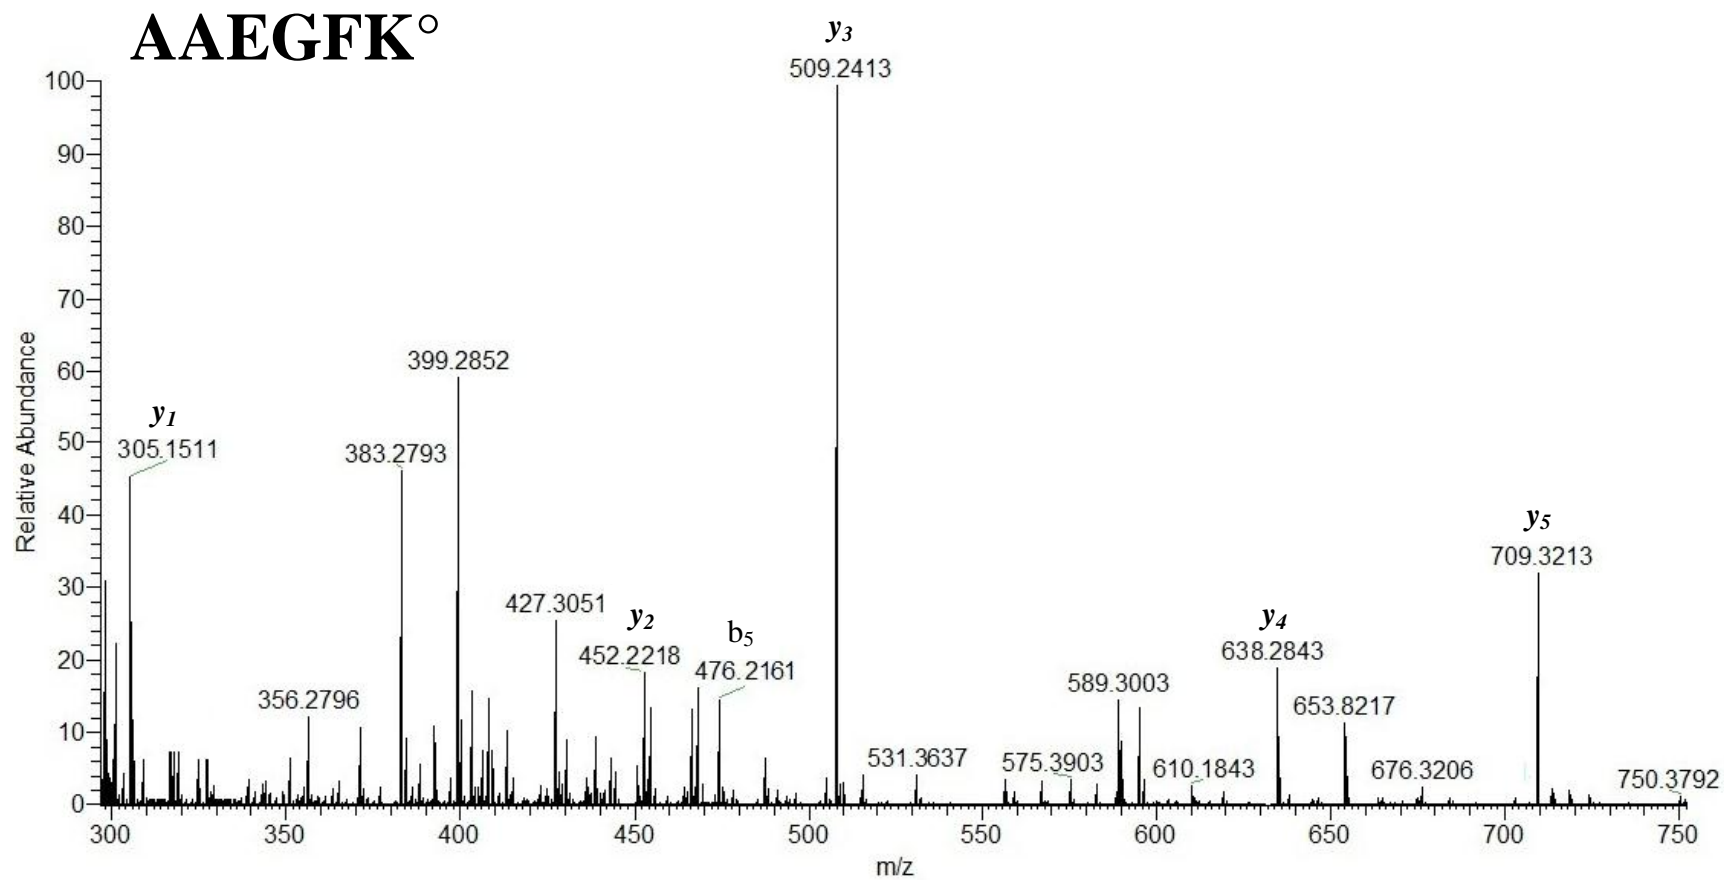



Figure S23: MS/MS of adducted PDI peptide [ITEFCHR + 1,2NPQ] at  $m/z$  1063.4670.

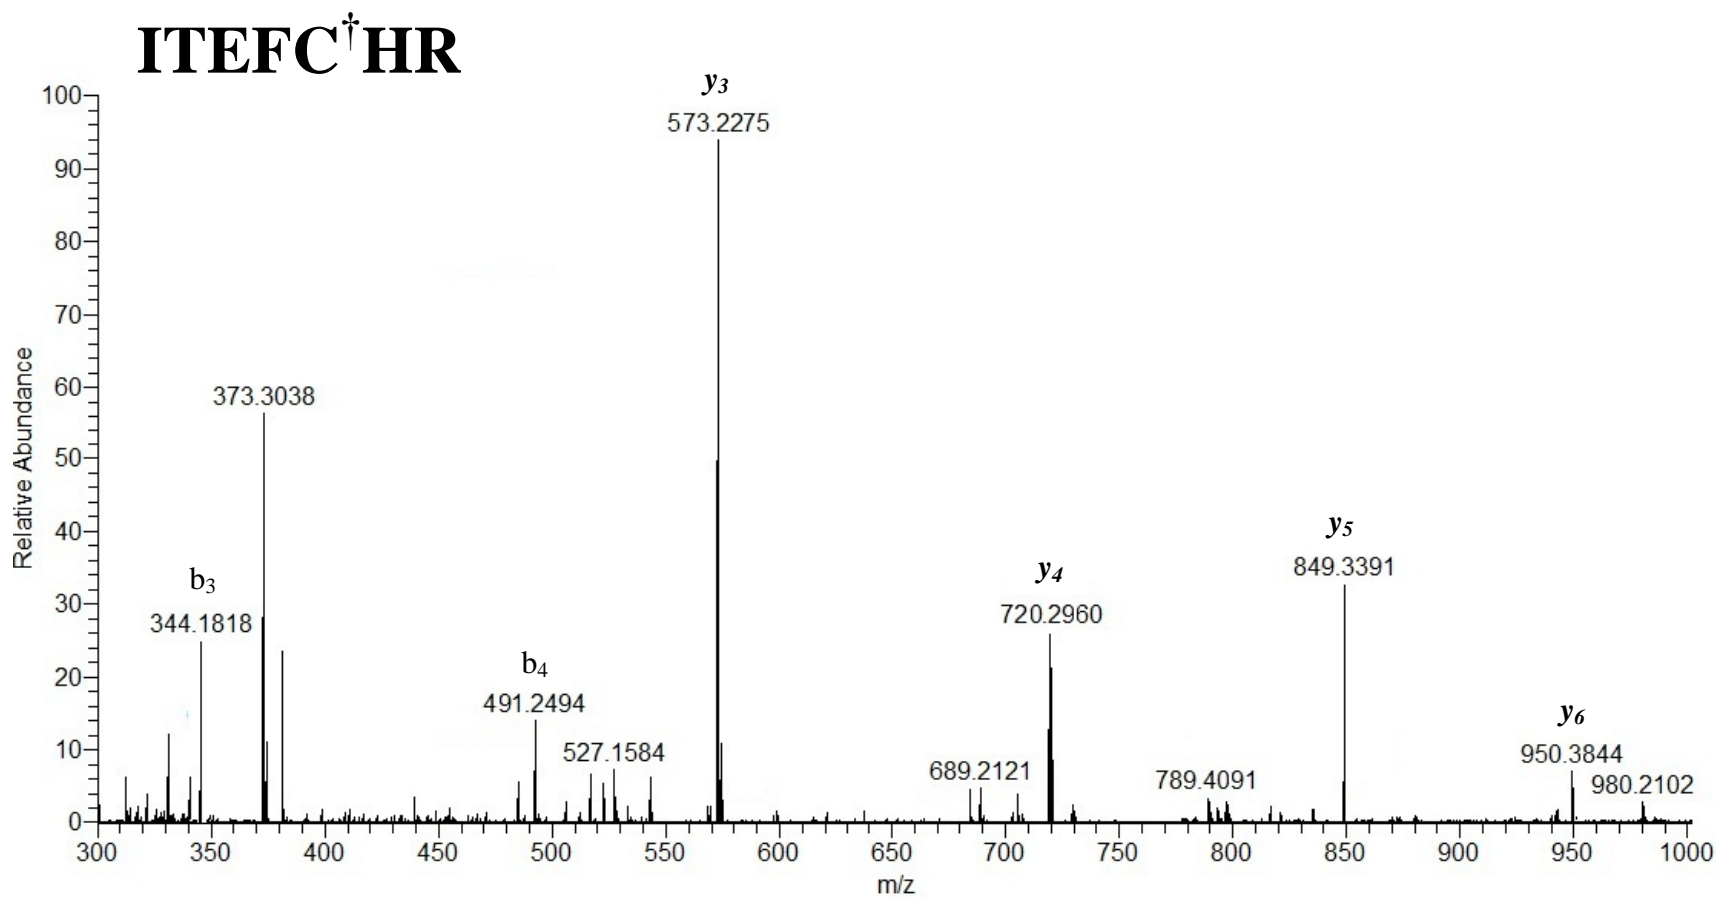

Figure S24: MS/MS of adducted PDI peptide [ITEFCHR + 1,4NPQ] at  $m/z$  1063.4661.

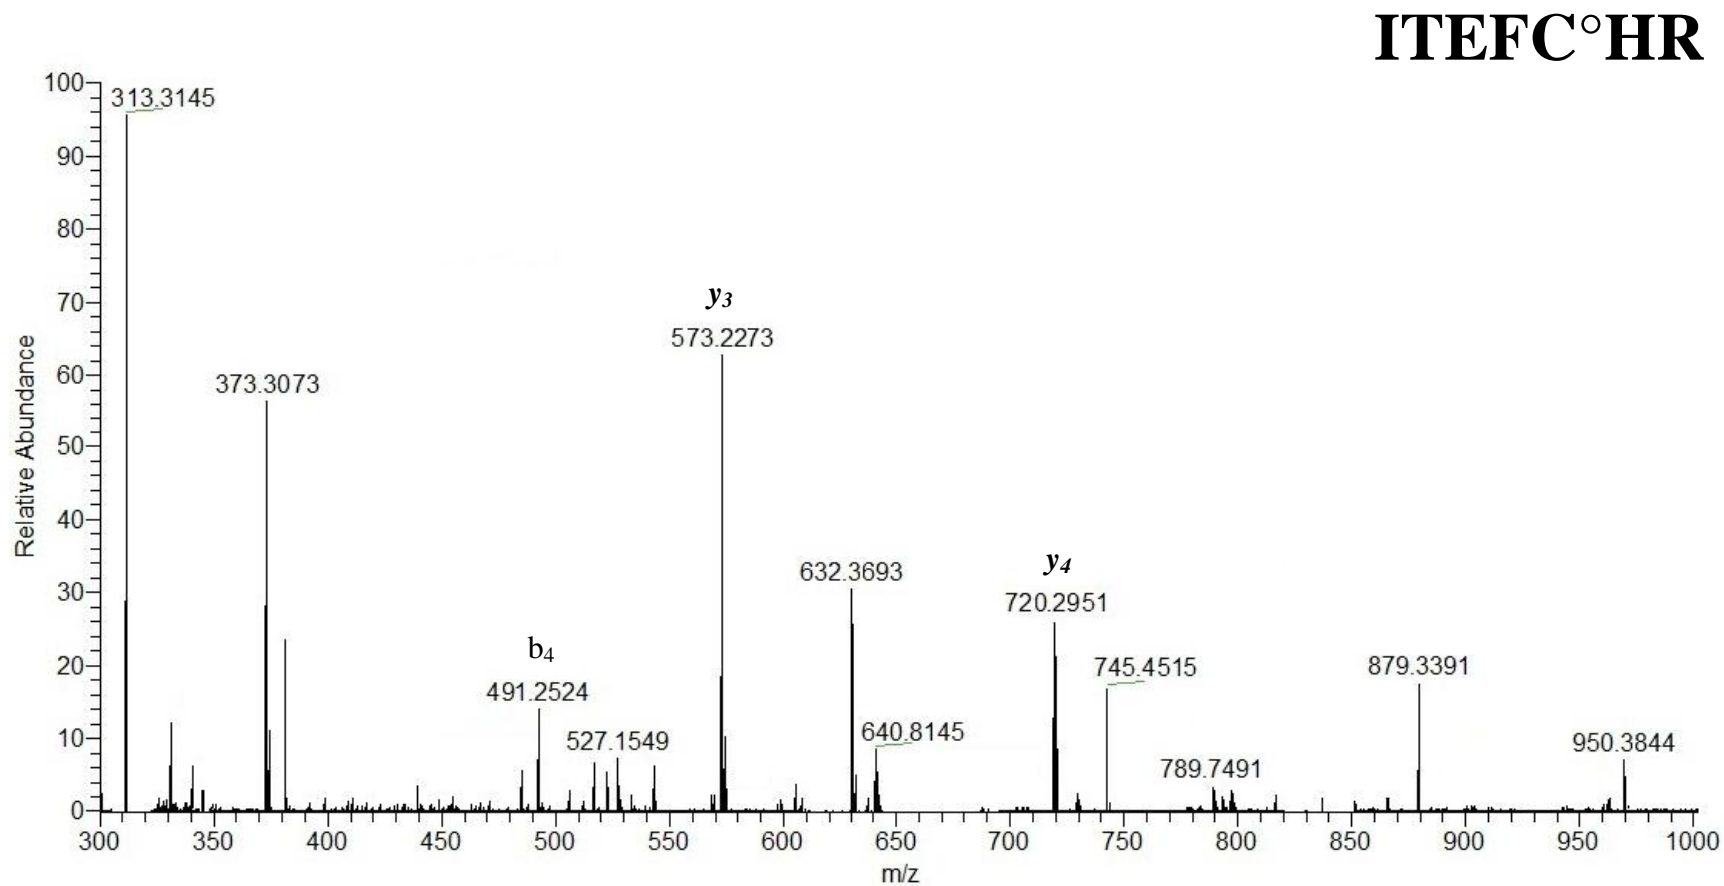

Supplement: NIHMS435004-supplement-01.pdf [file NIHMS435004-supplement-01.pdf]
